# Supplementary material for: Design, preparation and characterization of 7-hydroxy-4-methylcoumarin-based deep eutectic solvents
Source: Royal Society of Chemistry journal article supplement (doi:10.1039/d3nj02264a), 2023-01-01
Supplement: d3nj02264a1.pdf [file d3nj02264a1.pdf]

## ESI

### Design, preparation and characterization of 7-hydroxy-4-methylcoumarin based deep eutectic solvents

Martina Jakovljević Kovač<sup>1</sup>, Maja Molnar<sup>1\*</sup>, Tomislav Jednačak<sup>2</sup>, Tomislav Balić<sup>3</sup>, Jurica Novak<sup>4,5</sup>

<sup>1</sup>*Faculty of food technology Osijek, F. Kuhača 18 Osijek 31000, Croatia*

<sup>2</sup>*University of Zagreb, Faculty of Science, Department of Chemistry, Horvatovac 102a, HR-10000 Zagreb, Croatia*

<sup>3</sup>*Department of Chemistry, Josip Juraj Strossmayer University of Osijek, Cara Hadrijana 8/A, 31000 Osijek, Croatia.*

<sup>4</sup>*University of Rijeka, Department of Biotechnology, Radmile Matejčić 2, HR-51000 Rijeka, Croatia*

<sup>5</sup>*University of Rijeka, Center for Artificial Intelligence and Cyber security, Radmile Matejčić 2, HR-51000 Rijeka, Croatia*

#### Contents

|                                                                                                                                                                                                                                                                             |    |
|-----------------------------------------------------------------------------------------------------------------------------------------------------------------------------------------------------------------------------------------------------------------------------|----|
| Table S1. Appearance of pure compounds and their mixtures obtained in different mixing ratios. ....                                                                                                                                                                         | 3  |
| Fig. S1. Ternary solid-liquid phase diagram for (a) Lid:Cou:La and (b) Lid:Cou:Le. Black dots represent the experimental points of the solid phase and black crosses represent points of the liquid phase. The red circle represents the area of liquid form at 298 K. .... | 6  |
| Fig. S2. Hydroxyl proton chemical shift of 7-hydroxy-4-methylcoumarin in DMSO-d <sub>6</sub> as a function of temperature. ....                                                                                                                                             | 6  |
| Table S2. Viscosity as a function of temperature for Lid:Cou:La and Lid:Cou:Le DESs. ....                                                                                                                                                                                   | 7  |
| Fig. S3. VIS spectra of Nile red with: a) Lid:Cou:La; b) Lid:Cou:Le DESs. ....                                                                                                                                                                                              | 8  |
| Table S3. <sup>1</sup> H and <sup>13</sup> C NMR chemical shifts of La and Le in DMSO-d <sub>6</sub> at 0.4 mol L <sup>-1</sup> and 25 °C. ....                                                                                                                             | 9  |
| Table S4. <sup>1</sup> H NMR chemical shifts of Lid in DMSO-d <sub>6</sub> at different temperatures. ....                                                                                                                                                                  | 10 |
| Table S5. <sup>1</sup> H NMR chemical shifts of Cou in DMSO-d <sub>6</sub> at different temperatures. ....                                                                                                                                                                  | 10 |
| Table S6. <sup>1</sup> H NMR chemical shifts of La and Le in DMSO-d <sub>6</sub> at different temperatures. ....                                                                                                                                                            | 11 |

|                                                                                                                                                                                                                                  |    |
|----------------------------------------------------------------------------------------------------------------------------------------------------------------------------------------------------------------------------------|----|
| Table S7. <sup>1</sup> H NMR chemical shifts of Lid in DMSO-d <sub>6</sub> at different concentrations. ....                                                                                                                     | 11 |
| Table S8. <sup>1</sup> H NMR chemical shifts of Cou in DMSO-d <sub>6</sub> at different concentrations. ....                                                                                                                     | 12 |
| Table S9. <sup>1</sup> H NMR chemical shifts of La and Le in DMSO-d <sub>6</sub> at different concentrations. ....                                                                                                               | 12 |
| Fig. S4. IR spectra of Lid:Cou:La (blue) and Lid in Lid:Cou:Le (black). ....                                                                                                                                                     | 13 |
| Fig. S5. IR spectrum of coumarin. ....                                                                                                                                                                                           | 14 |
| Fig S6. Deconvoluted IR spectrum of Lid:Cou:La.....                                                                                                                                                                              | 15 |
| Fig. S7. Deconvoluted IR spectrum of Lid:Cou:Le.....                                                                                                                                                                             | 16 |
| Fig. S8. Evolution of the potential energy of the Lid:Cou:La (left) and Lid:Cou:Le (right) clusters along MD simulation. Dots represent 500 lowest energy structures, which entered into the second phase of optimizations. .... | 17 |
| Fig. S9. IR spectra of the top structures of Lid:Cou:La (left) and Lid:Cou:Le (right). ....                                                                                                                                      | 17 |
| Fig S11. TG (black) and dTG (red) curves of Lid:Cou:Le.....                                                                                                                                                                      | 18 |
| Fig S12. Low-temperature DSC curves of Lid:Cou:La. ....                                                                                                                                                                          | 18 |
| Fig S13. Low-temperature DSC curves of Lid:Cou:Le. ....                                                                                                                                                                          | 19 |
| Table S10. B3LYP/aug-cc-pVDZ optimized geometry of Le. ....                                                                                                                                                                      | 19 |
| Table S11. B3LYP/aug-cc-pVDZ optimized geometry of Lid.....                                                                                                                                                                      | 19 |
| Table S12. B3LYP/aug-cc-pVDZ optimized geometry of LidH. ....                                                                                                                                                                    | 20 |
| Table S13. B3LYP/aug-cc-pVDZ optimized geometry of deCou. ....                                                                                                                                                                   | 21 |
| Table S14. B3LYP/aug-cc-pVDZ optimized geometry of La. ....                                                                                                                                                                      | 22 |
| Table S15. B3LYP/cc-pVDZ optimized geometry of Lid:Cou:La structure A. ....                                                                                                                                                      | 22 |
| Table S16. B3LYP/cc-pVDZ optimized geometry of Lid:Cou:La structure B. ....                                                                                                                                                      | 27 |
| Table S17. B3LYP/cc-pVDZ optimized geometry of Lid:Cou:La structure C. ....                                                                                                                                                      | 32 |
| Table S18. B3LYP/cc-pVDZ optimized geometry of Lid:Cou:La structure D. ....                                                                                                                                                      | 37 |
| Table S19. B3LYP/cc-pVDZ optimized geometry of Lid:Cou:La structure E.....                                                                                                                                                       | 42 |
| Table S20. B3LYP/cc-pVDZ optimized geometry of Lid:Cou:Le structure A. ....                                                                                                                                                      | 47 |
| Table S21. B3LYP/cc-pVDZ optimized geometry of Lid:Cou:Le structure B. ....                                                                                                                                                      | 53 |
| Table S22. B3LYP/cc-pVDZ optimized geometry of Lid:Cou:Le structure C. ....                                                                                                                                                      | 58 |
| Table S23. B3LYP/cc-pVDZ//B3LYP-GD3BJ/6-311++g(d,p) counterpoise corrected interaction energies (in kcal mol <sup>-1</sup> ) of Lid:Cou:La and Lid:Cou:Le. ....                                                                  | 63 |

Table S1. Appearance of pure compounds and their mixtures obtained in different mixing ratios.

| Sample                                                                              | Component 1                | Component 2                | Component 3 | Molar ratio | Appearance        |
|-------------------------------------------------------------------------------------|----------------------------|----------------------------|-------------|-------------|-------------------|
|    | lidocaine                  | -                          | -           | -           | Solid             |
|    | 7-hydroxy-4 methylcoumarin | -                          | -           | -           | Solid             |
|    | lactic acid                | -                          | -           | -           | Liquid            |
|    | levulinic acid             | -                          | -           | -           | Liquid            |
|  | Mixed components           |                            |             |             |                   |
|  | lidocaine                  | 7-hydroxy-4 methylcoumarin | lactic acid | 1:1:1       | Opaque solid      |
|  | lidocaine                  | 7-hydroxy-4 methylcoumarin | lactic acid | 2:1:1       | Transparent solid |
|  | lidocaine                  | 7-hydroxy-4 methylcoumarin | lactic acid | 2:1:2       | Transparent solid |
|  | lidocaine                  | 7-hydroxy-4 methylcoumarin | lactic acid | 3:1:3       | Transparent solid |
|                                                                                     | lidocaine                  | 7-hydroxy-4 methylcoumarin | lactic acid | 4:1:4       | Viscous liquid    |

|                                                                                     |           |                            |                |       |                   |
|-------------------------------------------------------------------------------------|-----------|----------------------------|----------------|-------|-------------------|
|    |           |                            |                |       |                   |
|    | lidocaine | 7-hydroxy-4 methylcoumarin | lactic acid    | 5:1:4 | Viscous liquid    |
|    | lidocaine | 7-hydroxy-4 methylcoumarin | lactic acid    | 5:1:5 | Viscous liquid    |
|    | lidocaine | 7-hydroxy-4 methylcoumarin | lactic acid    | 5:1:6 | Liquid            |
|    | lidocaine | 7-hydroxy-4 methylcoumarin | lactic acid    | 8:1:8 | Liquid            |
|  | lidocaine | 7-hydroxy-4 methylcoumarin | levulinic acid | 1:1:1 | Opaque solid      |
|  | lidocaine | 7-hydroxy-4 methylcoumarin | levulinic acid | 2:1:1 | Transparent solid |
|  | lidocaine | 7-hydroxy-4 methylcoumarin | levulinic acid | 2:1:2 | Transparent solid |
|  | lidocaine | 7-hydroxy-4 methylcoumarin | levulinic acid | 3:1:3 | Viscous liquid    |
|  | lidocaine | 7-hydroxy-4 methylcoumarin | levulinic acid | 4:1:4 | Liquid            |

|                                                                                   |           |                               |                |       |        |
|-----------------------------------------------------------------------------------|-----------|-------------------------------|----------------|-------|--------|
|  | lidocaine | 7-hydroxy-4<br>methylcoumarin | levulinic acid | 5:1:4 | Liquid |
|  | lidocaine | 7-hydroxy-4<br>methylcoumarin | levulinic acid | 5:1:5 | Liquid |
|  | lidocaine | 7-hydroxy-4<br>methylcoumarin | levulinic acid | 5:1:6 | Liquid |
|  | lidocaine | 7-hydroxy-4<br>methylcoumarin | levulinic acid | 8:1:8 | Liquid |

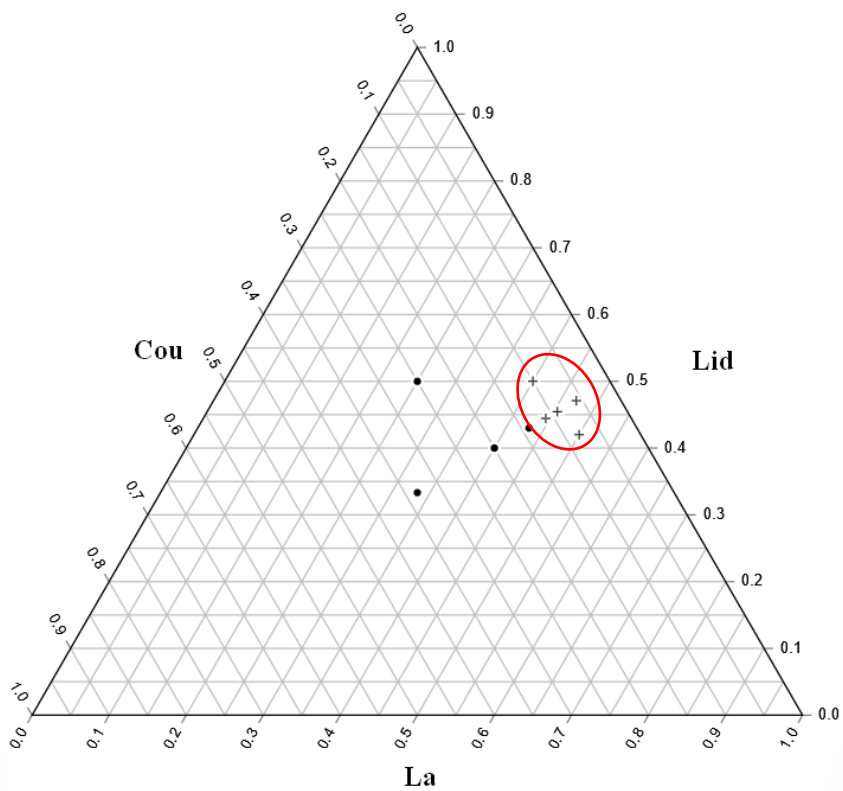

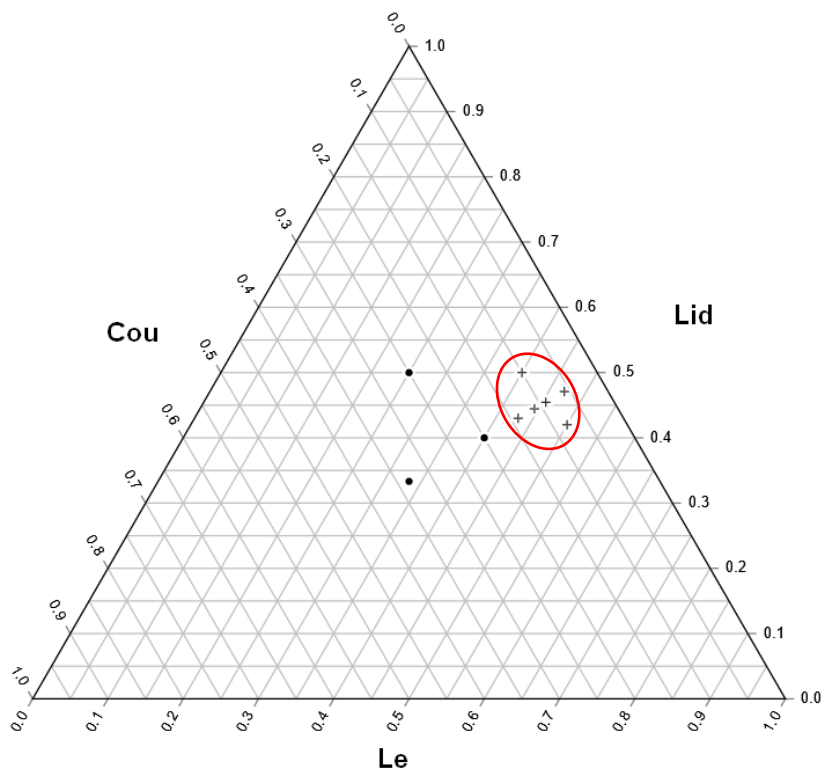

Fig. S1. Ternary solid-liquid phase diagram for (a) Lid:Cou:La and (b) Lid:Cou:La. Black dots represent the experimental points of the solid phase and black crosses represent points of the liquid phase. The red circle represents the area of liquid form at 298 K.

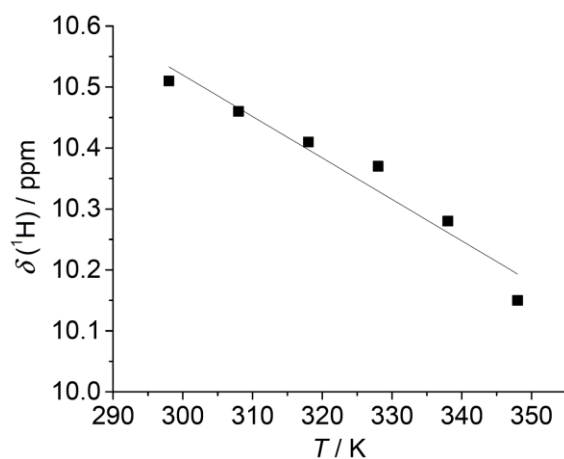

Fig. S2. Hydroxyl proton chemical shift of 7-hydroxy-4-methylcoumarin in DMSO- $d_6$  as a function of temperature.

Table S2. Viscosity as a function of temperature for Lid:Cou:La and Lid:Cou:Le DESs.

| <b>Lid:Cou:La</b> |                | <b>Lid:Cou:Le</b> |                |
|-------------------|----------------|-------------------|----------------|
| <i>T</i> (°C)     | $\eta$ (mPa/s) | <i>T</i> (°C)     | $\eta$ (mPa/s) |
| 59.57             | 3939.55        | 59.525            | 296.375        |
| 58.475            | 3587.25        | 58.41             | 285.46         |
| 57.14             | 3741.6         | 57.095            | 292.865        |
| 55.75             | 4105.8         | 55.71             | 308.775        |
| 54.385            | 4708.9         | 54.335            | 332.445        |
| 53.03             | 5506.25        | 52.975            | 368.38         |
| 51.635            | 6399.6         | 51.62             | 411.045        |
| 50.24             | 7557.65        | 50.245            | 457.98         |
| 48.86             | 9031.2         | 48.87             | 518.235        |
| 47.47             | 10835.2        | 47.495            | 582.72         |
| 46.09             | 13121.5        | 46.13             | 670.125        |
| 44.71             | 15967.5        | 44.735            | 755.84         |
| 43.325            | 19573.5        | 43.35             | 857.345        |
| 41.95             | 24156.5        | 41.955            | 974.71         |
| 40.56             | 29896.5        | 40.57             | 1112.75        |
| 39.18             | 37315          | 39.19             | 1275.35        |
| 37.8              | 46782.5        | 37.81             | 1467.15        |
| 36.42             | 59054          | 36.425            | 1695.15        |
| 35.04             | 75256          | 35.04             | 1967.4         |
| 33.65             | 96389          | 33.66             | 2290.5         |
| 32.27             | 123790         | 32.275            | 2679.4         |
| 30.89             | 160530         | 30.89             | 3144.55        |
| 29.51             | 210290         | 29.51             | 3706.25        |
| 28.13             | 276190         | 28.125            | 4384.9         |
| 26.75             | 366820         | 26.745            | 5220           |
| 25.37             | 483575         | 25.37             | 6242.85        |

|        |         |        |         |
|--------|---------|--------|---------|
| 23.99  | 607740  | 23.99  | 7489.7  |
| 22.605 | 826060  | 22.61  | 9021.7  |
| 21.225 | 1184400 | 21.23  | 10942.5 |
| 19.84  | 1695950 | 19.845 | 13326   |

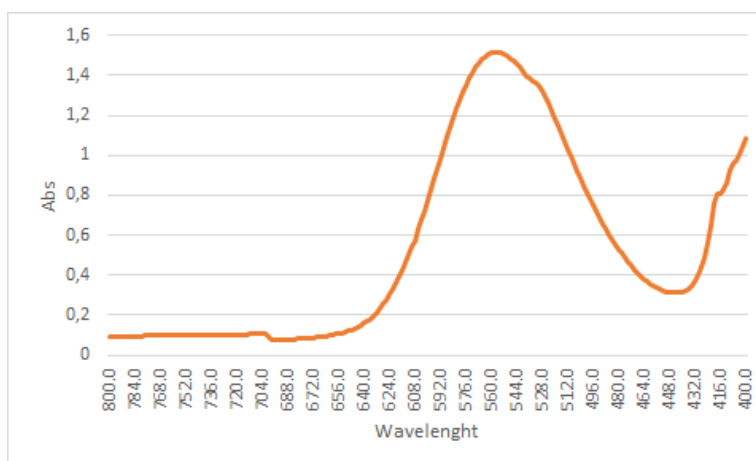

a)

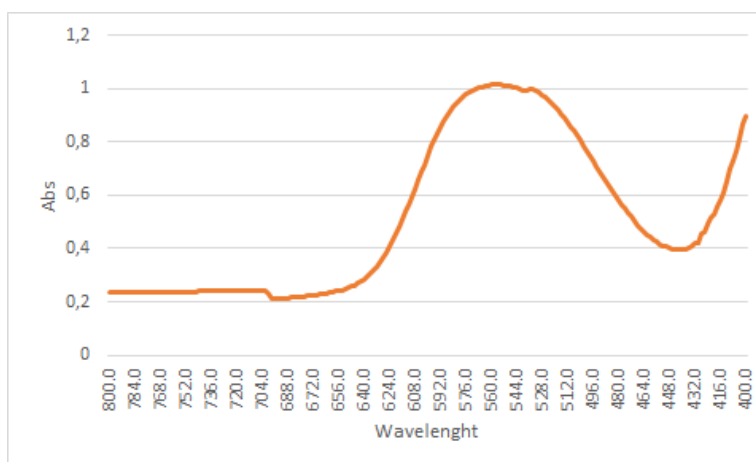

b)

Fig. S3. VIS spectra of Nile red with: a) Lid:Cou:La; b) Lid:Cou:Le DESs.



Table S3.  $^1\text{H}$  and  $^{13}\text{C}$  NMR chemical shifts of La and Le in DMSO- $d_6$  at  $0.4 \text{ mol L}^{-1}$  and  $25 \text{ }^\circ\text{C}$ .

| Atom | La                              |                                    | La in Lid:Cou:La                |                                    | Le                              |                                    | Le in Lid:Cou:Le                |                                    |
|------|---------------------------------|------------------------------------|---------------------------------|------------------------------------|---------------------------------|------------------------------------|---------------------------------|------------------------------------|
|      | $\delta(^1\text{H})/\text{ppm}$ | $\delta(^{13}\text{C})/\text{ppm}$ | $\delta(^1\text{H})/\text{ppm}$ | $\delta(^{13}\text{C})/\text{ppm}$ | $\delta(^1\text{H})/\text{ppm}$ | $\delta(^{13}\text{C})/\text{ppm}$ | $\delta(^1\text{H})/\text{ppm}$ | $\delta(^{13}\text{C})/\text{ppm}$ |
| 1    |                                 | 176.35                             |                                 | 176.54                             |                                 | 173.78                             |                                 | 173.80                             |
| 1OH  | 12.38                           |                                    | – <sup>a</sup>                  |                                    | 12.07                           |                                    | 10.70                           |                                    |
| 2    | 4.03                            | 65.80                              | 4.02                            | 65.90                              | 2.37                            | 27.70                              | 2.39                            | 27.77                              |
| 2OH  | 5.14                            |                                    | – <sup>a</sup>                  |                                    |                                 |                                    |                                 |                                    |
| 3    | 1.23                            | 20.49                              | 1.24                            | 20.55                              | 2.65                            | 37.54                              | 2.65                            | 37.55                              |
| 4    |                                 |                                    |                                 |                                    |                                 | 207.02                             |                                 | 206.96                             |
| 5    |                                 |                                    |                                 |                                    | 2.09                            | 29.61                              | 2.10                            | 29.59                              |

<sup>a</sup> not observed

Table S4. <sup>1</sup>H NMR chemical shifts of Lid in DMSO-d<sub>6</sub> at different temperatures.

| Atom       | Lid                             |       |                                   | Lid in Lid:Cou:La               |       |                                   | Lid in Lid:Cou:Le               |       |                                   |
|------------|---------------------------------|-------|-----------------------------------|---------------------------------|-------|-----------------------------------|---------------------------------|-------|-----------------------------------|
|            | $\delta(^1\text{H})/\text{ppm}$ |       | $\Delta(^1\text{H})/\text{ppm}^a$ | $\delta(^1\text{H})/\text{ppm}$ |       | $\Delta(^1\text{H})/\text{ppm}^a$ | $\delta(^1\text{H})/\text{ppm}$ |       | $\Delta(^1\text{H})/\text{ppm}^a$ |
|            | 298 K                           | 348 K |                                   | 298 K                           | 348 K |                                   | 298 K                           | 348 K |                                   |
| 2          | 3.13                            | 3.16  | -0.03                             | 3.19                            | 3.19  | 0                                 | 3.15                            | 3.17  | -0.02                             |
| 2'Me, 6'Me | 2.13                            | 2.16  | -0.03                             | 2.13                            | 2.16  | -0.03                             | 2.13                            | 2.16  | -0.03                             |
| 3'(5')     | 7.06                            | 7.06  | 0                                 | 7.06                            | 7.06  | 0                                 | 7.06                            | 7.06  | 0                                 |
| 4'         | 7.06                            | 7.06  | 0                                 | 7.06                            | 7.06  | 0                                 | 7.06                            | 7.06  | 0                                 |
| NH         | 9.15                            | 8.99  | 0.16                              | 9.20                            | 9.01  | 0.19                              | 9.17                            | 8.99  | 0.17                              |
| A(A')      | 2.62                            | 2.66  | -0.04                             | 2.65                            | 2.67  | -0.02                             | 2.63                            | 2.67  | -0.04                             |
| B(B')      | 1.07                            | 1.09  | -0.02                             | 1.08                            | 1.10  | -0.02                             | 1.07                            | 1.09  | -0.02                             |

$$^a\Delta(^1\text{H})/\text{ppm} = \delta(^1\text{H}, 298 \text{ K})/\text{ppm} - \delta(^1\text{H}, 348 \text{ K})/\text{ppm}$$

Table S5. <sup>1</sup>H NMR chemical shifts of Cou in DMSO-d<sub>6</sub> at different temperatures.

| Atom | Cou                             |       |                                   | Cou in Lid:Cou:La               |              |                                   | Cou in Lid:Cou:Le               |              |                                   |
|------|---------------------------------|-------|-----------------------------------|---------------------------------|--------------|-----------------------------------|---------------------------------|--------------|-----------------------------------|
|      | $\delta(^1\text{H})/\text{ppm}$ |       | $\Delta(^1\text{H})/\text{ppm}^a$ | $\delta(^1\text{H})/\text{ppm}$ |              | $\Delta(^1\text{H})/\text{ppm}^a$ | $\delta(^1\text{H})/\text{ppm}$ |              | $\Delta(^1\text{H})/\text{ppm}^a$ |
|      | 298 K                           | 348 K |                                   | 298 K                           | 348 K        |                                   | 298 K                           | 348 K        |                                   |
| 3    | 6.12                            | 6.08  | 0.04                              | 6.12                            | 6.09         | 0.03                              | 6.12                            | 6.09         | 0.03                              |
| 4Me  | 2.36                            | 2.37  | -0.01                             | 2.36                            | 2.37         | -0.01                             | 2.36                            | 2.37         | -0.01                             |
| 5    | 7.59                            | 7.58  | 0.01                              | 7.59                            | 7.58         | 0.01                              | 7.59                            | 7.58         | 0.01                              |
| 6    | 6.80                            | 6.80  | 0                                 | 6.81                            | 6.81         | 0                                 | 6.80                            | 6.81         | -0.01                             |
| 7OH  | 10.51                           | 10.15 | 0.36                              | <sub>b</sub>                    | <sub>b</sub> | <sub>b</sub>                      | <sub>b</sub>                    | <sub>b</sub> | <sub>b</sub>                      |
| 8    | 6.70                            | 6.70  | 0                                 | 6.71                            | 6.71         | 0                                 | 6.71                            | 6.70         | 0.01                              |

$$^a\Delta(^1\text{H})/\text{ppm} = \delta(^1\text{H}, 298 \text{ K})/\text{ppm} - \delta(^1\text{H}, 348 \text{ K})/\text{ppm}$$

<sup>b</sup> not observed

Table S6. <sup>1</sup>H NMR chemical shifts of La and Le in DMSO-d<sub>6</sub> at different temperatures.

| Atom | La                              |       |                                   | La in Lid:Cou:La                |       |                                   | Le                              |       |                                   | Le in Lid:Cou:Le                |       |                                   |
|------|---------------------------------|-------|-----------------------------------|---------------------------------|-------|-----------------------------------|---------------------------------|-------|-----------------------------------|---------------------------------|-------|-----------------------------------|
|      | $\delta(^1\text{H})/\text{ppm}$ |       | $\Delta(^1\text{H})/\text{ppm}^a$ |
|      | 298 K                           | 348 K |                                   | 298 K                           | 348 K |                                   | 298 K                           | 348 K |                                   | 298 K                           | 348 K |                                   |
| 1OH  | 12.43                           | 12.16 | 0.27                              | _b                              | _b    | _b                                | 12.07                           | 11.79 | 0.28                              | 11.57                           | 11.14 | 0.43                              |
| 2    | 4.04                            | 4.06  | -0.02                             | 4.02                            | 4.06  | -0.04                             | 2.37                            | 2.41  | -0.04                             | 2.38                            | 2.41  | -0.03                             |
| 2OH  | 5.15                            | 5.14  | 0.01                              | _b                              | _b    | _b                                |                                 |       |                                   |                                 |       |                                   |
| 3    | 1.23                            | 1.26  | -0.03                             | 1.23                            | 1.26  | -0.03                             | 2.65                            | 2.65  | 0                                 | 2.65                            | 2.67  | -0.02                             |
| 4    |                                 |       |                                   |                                 |       |                                   |                                 |       |                                   |                                 |       |                                   |
| 5    |                                 |       |                                   |                                 |       |                                   | 2.09                            | 2.10  | -0.01                             | 2.09                            | 2.10  | -0.01                             |

$$^a\Delta(^1\text{H})/\text{ppm} = \delta(^1\text{H}, 298 \text{ K})/\text{ppm} - \delta(^1\text{H}, 348 \text{ K})/\text{ppm}$$

<sup>b</sup> not observed

Table S7. <sup>1</sup>H NMR chemical shifts of Lid in DMSO-d<sub>6</sub> at different concentrations.

| Atom       | Lid                             |           |                                   | Lid in Lid:Cou:La               |           |                                   | Lid in Lid:Cou:Le               |           |                                   |
|------------|---------------------------------|-----------|-----------------------------------|---------------------------------|-----------|-----------------------------------|---------------------------------|-----------|-----------------------------------|
|            | $\delta(^1\text{H})/\text{ppm}$ |           | $\Delta(^1\text{H})/\text{ppm}^a$ | $\delta(^1\text{H})/\text{ppm}$ |           | $\Delta(^1\text{H})/\text{ppm}^a$ | $\delta(^1\text{H})/\text{ppm}$ |           | $\Delta(^1\text{H})/\text{ppm}^a$ |
|            | 0.1 mol/L                       | 0.4 mol/L |                                   | 0.1 mol/L                       | 0.4 mol/L |                                   | 0.1 mol/L                       | 0.4 mol/L |                                   |
| 2          | 3.13                            | 3.14      | -0.01                             | 3.19                            | 3.26      | -0.07                             | 3.15                            | 3.17      | -0.02                             |
| 2'Me, 6'Me | 2.13                            | 2.15      | -0.02                             | 2.13                            | 2.14      | -0.01                             | 2.13                            | 2.14      | -0.01                             |
| 3'(5')     | 7.06                            | 7.07      | -0.01                             | 7.06                            | 7.06      | 0                                 | 7.06                            | 7.06      | 0                                 |
| 4'         | 7.06                            | 7.07      | -0.01                             | 7.06                            | 7.06      | 0                                 | 7.06                            | 7.06      | 0                                 |
| NH         | 9.15                            | 9.16      | -0.01                             | 9.20                            | 9.27      | -0.07                             | 9.17                            | 9.18      | -0.01                             |
| A(A')      | 2.62                            | 2.63      | -0.01                             | 2.65                            | 2.69      | -0.04                             | 2.63                            | 2.64      | -0.01                             |
| B(B')      | 1.07                            | 1.08      | -0.01                             | 1.08                            | 1.09      | -0.01                             | 1.07                            | 1.08      | -0.01                             |

$$^a\Delta(^1\text{H})/\text{ppm} = \delta(^1\text{H}, 0.1 \text{ mol/L})/\text{ppm} - \delta(^1\text{H}, 0.4 \text{ mol/L})/\text{ppm}$$

Table S8. <sup>1</sup>H NMR chemical shifts of Cou in DMSO-d<sub>6</sub> at different concentrations.

| Atom | Cou                             |           |                                   | Cou in Lid: Cou:La              |                |                                   | Cou in Lid: Cou:Le              |                |                                   |
|------|---------------------------------|-----------|-----------------------------------|---------------------------------|----------------|-----------------------------------|---------------------------------|----------------|-----------------------------------|
|      | $\delta(^1\text{H})/\text{ppm}$ |           | $\Delta(^1\text{H})/\text{ppm}^a$ | $\delta(^1\text{H})/\text{ppm}$ |                | $\Delta(^1\text{H})/\text{ppm}^a$ | $\delta(^1\text{H})/\text{ppm}$ |                | $\Delta(^1\text{H})/\text{ppm}^a$ |
|      | 0.1 mol/L                       | 0.4 mol/L |                                   | 0.1 mol/L                       | 0.4 mol/L      |                                   | 0.1 mol/L                       | 0.4 mol/L      |                                   |
| 3    | 6.12                            | 6.09      | 0.03                              | 6.12                            | 6.10           | 0.02                              | 6.12                            | 6.11           | 0.01                              |
| 4Me  | 2.36                            | 2.34      | 0.02                              | 2.36                            | 2.35           | 0.01                              | 2.36                            | 2.35           | 0.01                              |
| 5    | 7.59                            | 7.55      | 0.04                              | 7.59                            | 7.57           | 0.02                              | 7.59                            | 7.57           | 0.02                              |
| 6    | 6.80                            | 6.78      | 0.02                              | 6.81                            | 6.81           | 0                                 | 6.80                            | 6.81           | -0.01                             |
| 7OH  | 10.51                           | 10.51     | 0                                 | - <sup>b</sup>                  | - <sup>b</sup> | - <sup>b</sup>                    | - <sup>b</sup>                  | - <sup>b</sup> | - <sup>b</sup>                    |
| 8    | 6.70                            | 6.68      | 0.02                              | 6.71                            | 6.72           | -0.01                             | 6.71                            | 6.71           | 0                                 |

$$^a\Delta(^1\text{H})/\text{ppm} = \delta(^1\text{H}, 0.1 \text{ mol/L})/\text{ppm} - \delta(^1\text{H}, 0.4 \text{ mol/L})/\text{ppm}$$

<sup>b</sup> not observed

Table S9. <sup>1</sup>H NMR chemical shifts of La and Le in DMSO-d<sub>6</sub> at different concentrations.

| Atom | La                              |           |                                   | La in Lid: Cou:La               |                |                                   | Le                              |           |                                   | Le in Lid: Cou:Le               |           |                                   |
|------|---------------------------------|-----------|-----------------------------------|---------------------------------|----------------|-----------------------------------|---------------------------------|-----------|-----------------------------------|---------------------------------|-----------|-----------------------------------|
|      | $\delta(^1\text{H})/\text{ppm}$ |           | $\Delta(^1\text{H})/\text{ppm}^a$ | $\delta(^1\text{H})/\text{ppm}$ |                | $\Delta(^1\text{H})/\text{ppm}^a$ | $\delta(^1\text{H})/\text{ppm}$ |           | $\Delta(^1\text{H})/\text{ppm}^a$ | $\delta(^1\text{H})/\text{ppm}$ |           | $\Delta(^1\text{H})/\text{ppm}^a$ |
|      | 0.1 mol/L                       | 0.4 mol/L |                                   | 0.1 mol/L                       | 0.4 mol/L      |                                   | 0.1 mol/L                       | 0.4 mol/L |                                   | 0.1 mol/L                       | 0.4 mol/L |                                   |
| 1OH  | 12.43                           | 12.38     | 0.05                              | - <sup>b</sup>                  | - <sup>b</sup> | - <sup>b</sup>                    | 12.07                           | 12.07     | 0                                 | 11.57                           | 10.70     | 0.87                              |
| 2    | 4.04                            | 4.03      | 0.01                              | 4.02                            | 4.02           | 0                                 | 2.37                            | 2.37      | 0                                 | 2.38                            | 2.39      | -0.01                             |
| 2OH  | 5.15                            | 5.14      | 0.01                              | - <sup>b</sup>                  | - <sup>b</sup> | - <sup>b</sup>                    |                                 |           |                                   |                                 |           |                                   |
| 3    | 1.23                            | 1.23      | 0                                 | 1.23                            | 1.24           | -0.01                             | 2.65                            | 2.65      | 0                                 | 2.65                            | 2.65      | 0                                 |
| 4    |                                 |           |                                   |                                 |                |                                   |                                 |           |                                   |                                 |           |                                   |
| 5    |                                 |           |                                   |                                 |                |                                   | 2.09                            | 2.09      | 0                                 | 2.09                            | 2.10      | -0.01                             |

$$^a\Delta(^1\text{H})/\text{ppm} = \delta(^1\text{H}, 0.1 \text{ mol/L})/\text{ppm} - \delta(^1\text{H}, 0.4 \text{ mol/L})/\text{ppm}$$

<sup>b</sup> not observed

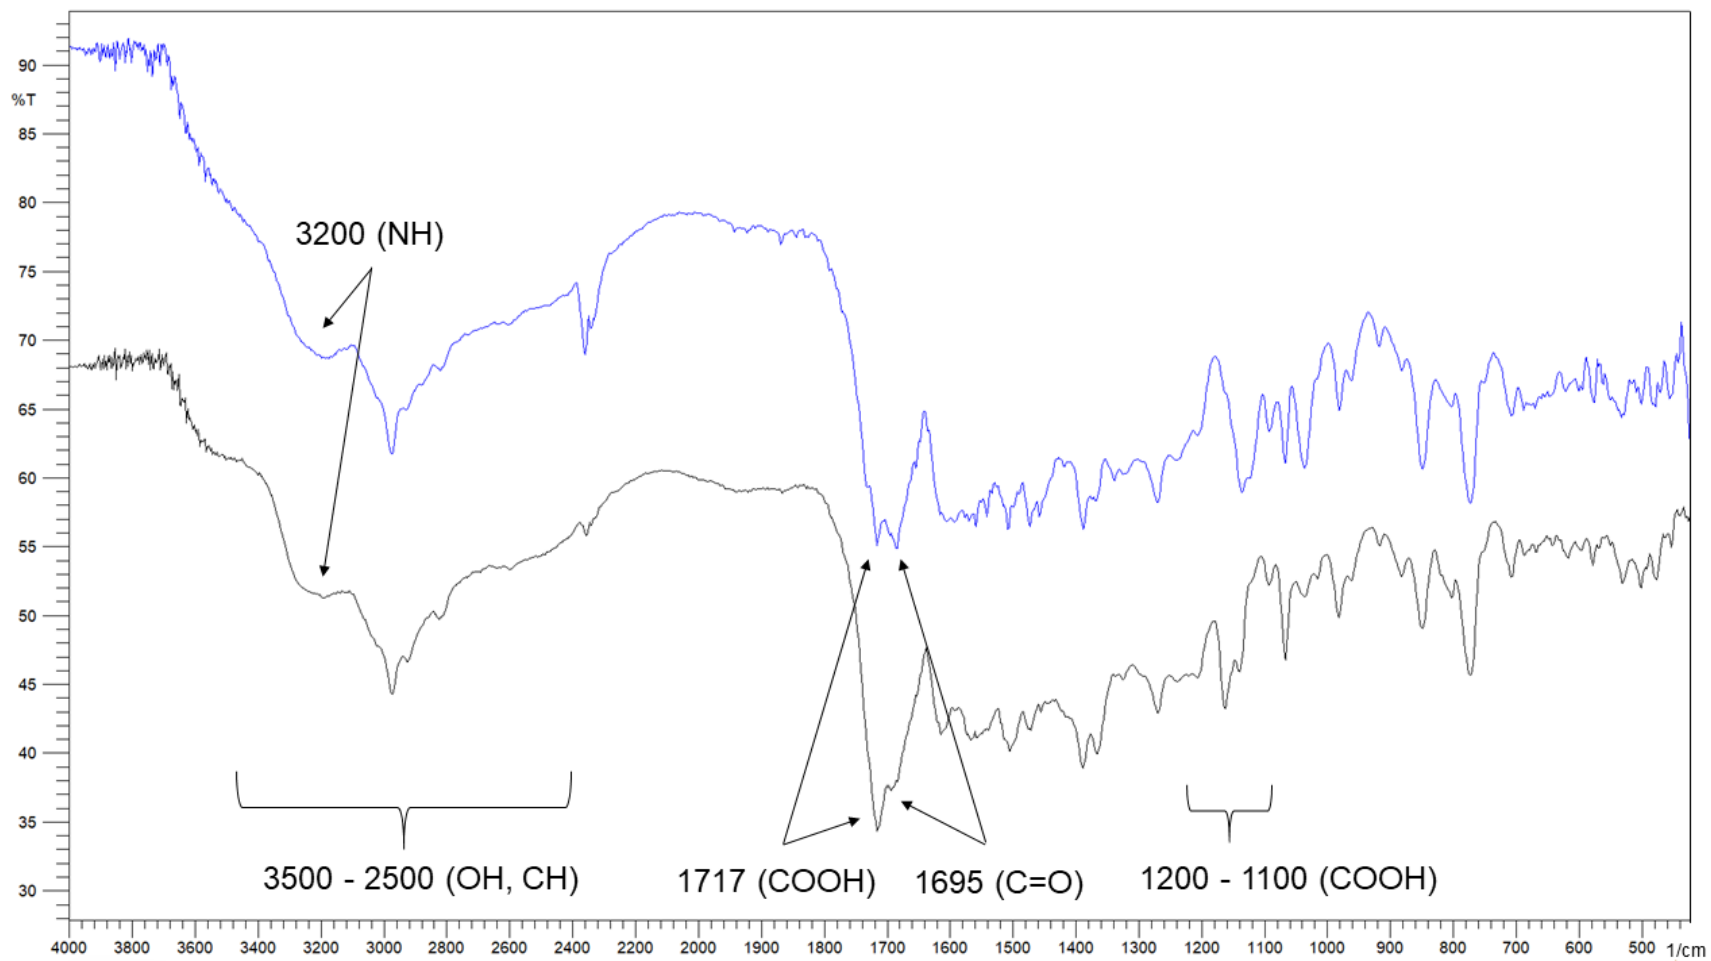

Fig. S4. IR spectra of Lid:Cou:La (blue) and Lid in Lid:Cou:Le (black).

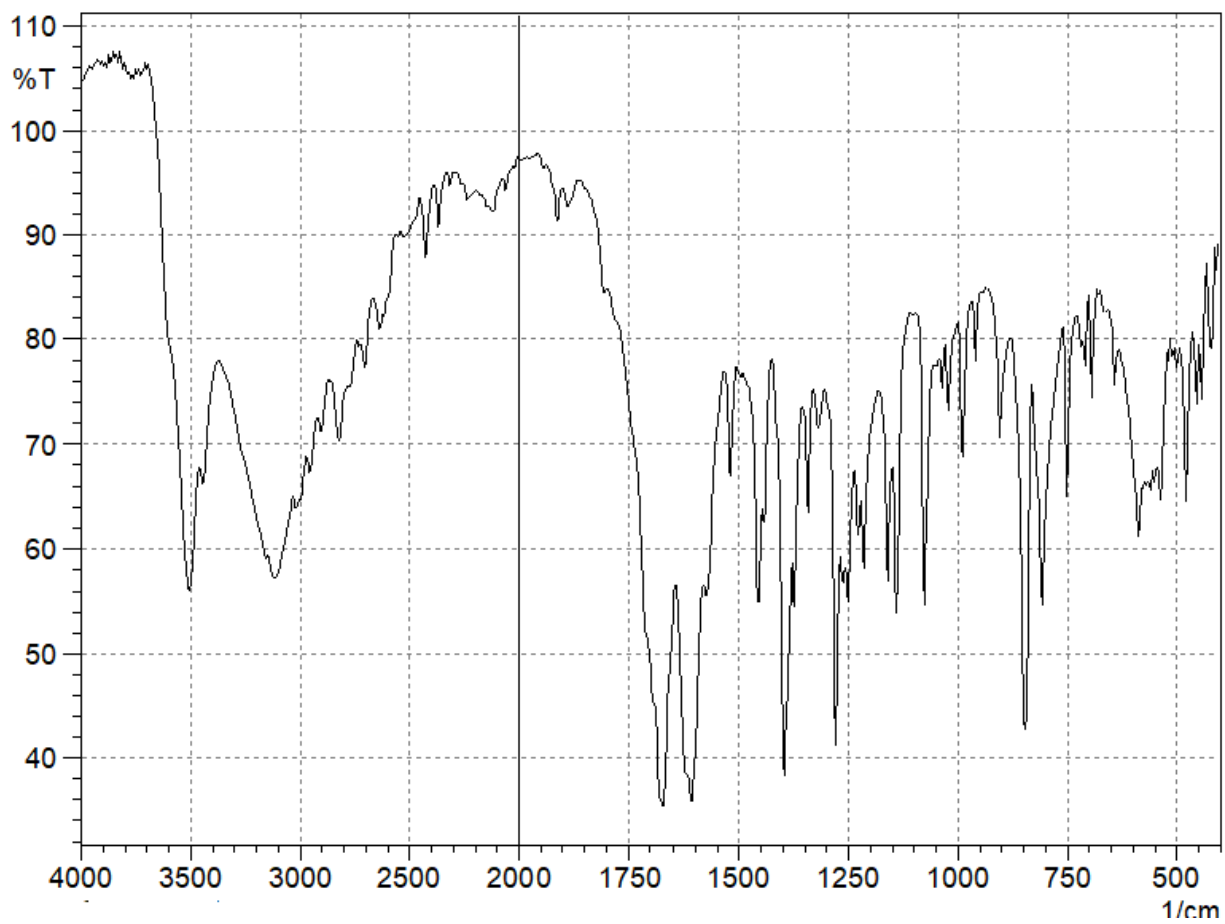

Fig. S5. IR spectrum of coumarin.

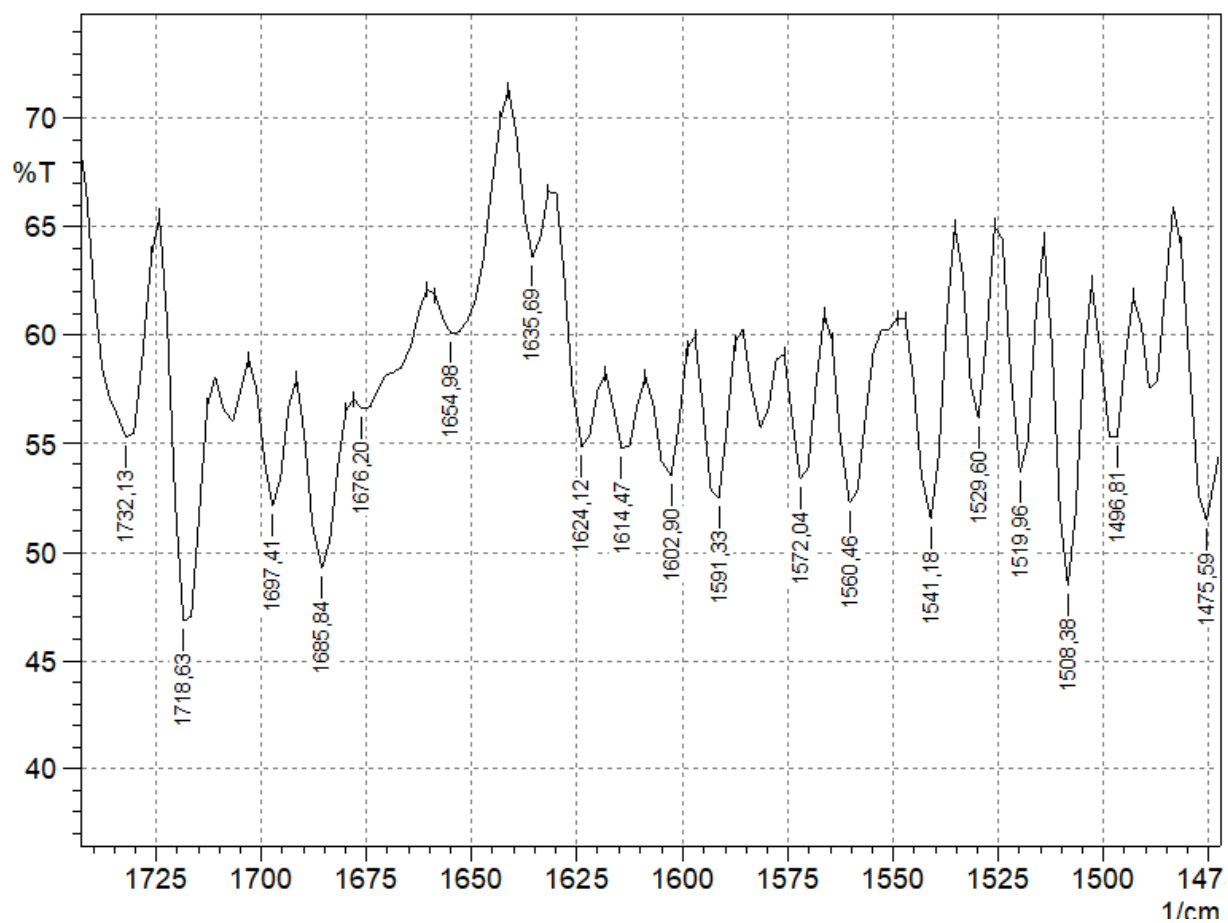

Fig S6. Deconvoluted IR spectrum of Lid:Cou:La.

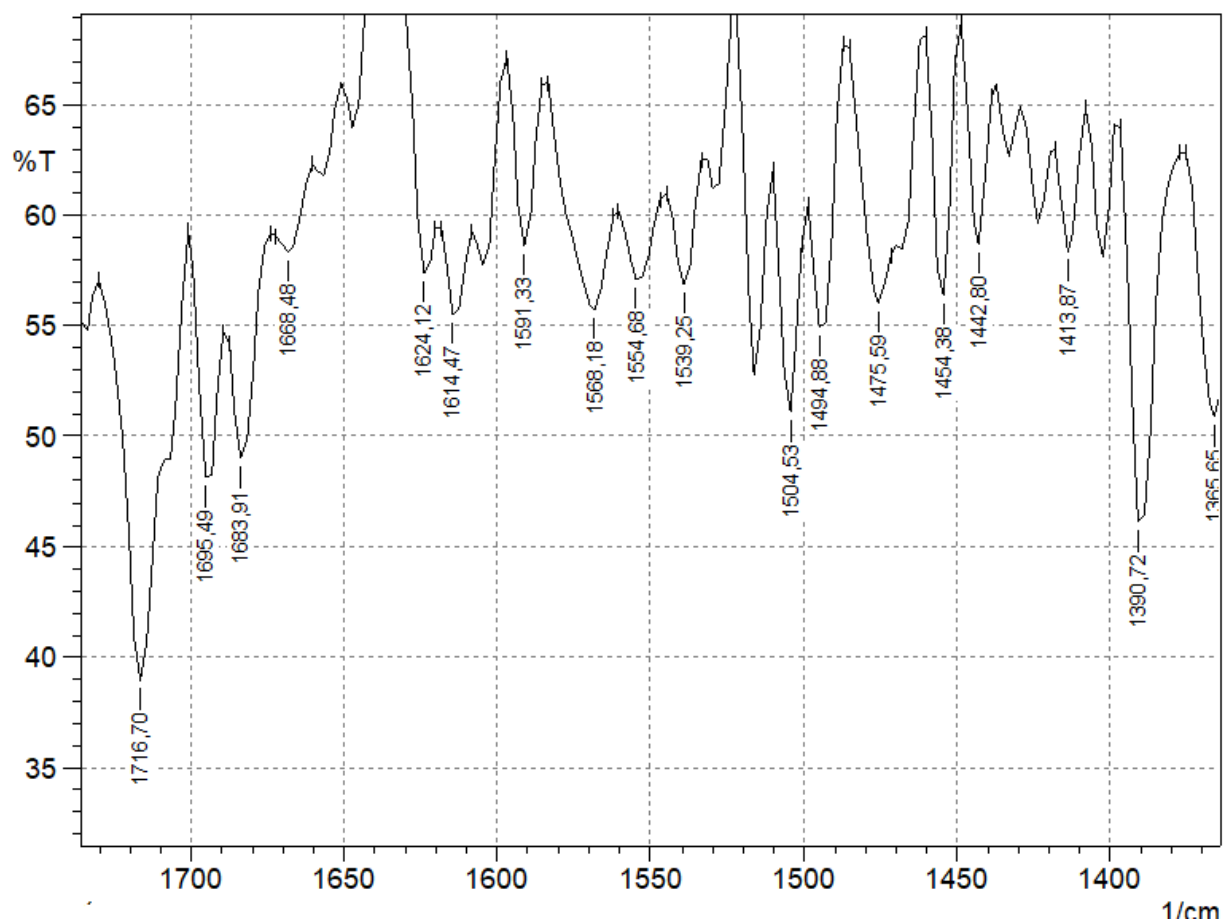

Fig. S7. Deconvoluted IR spectrum of Lid:Cou:Le.



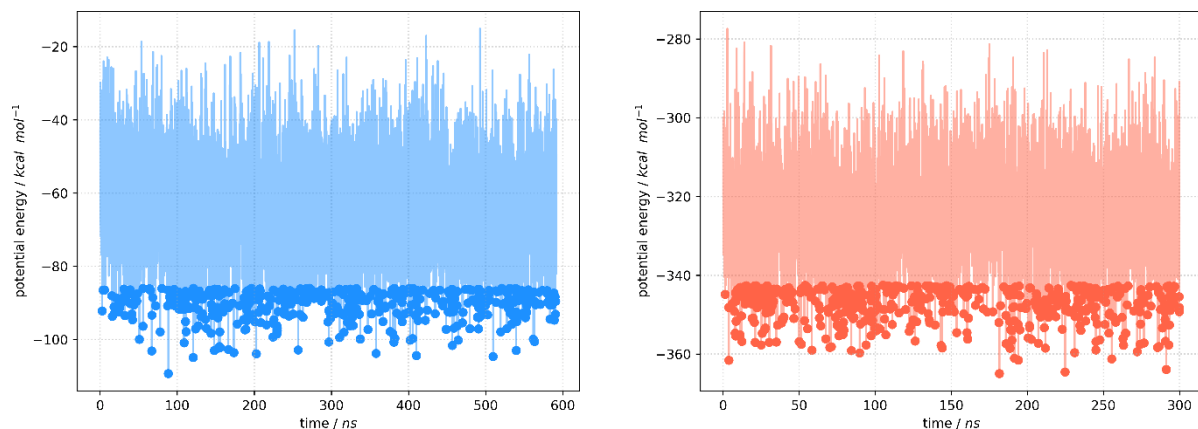

Fig. S8. Evolution of the potential energy of the Lid:Cou:La (left) and Lid:Cou:Le (right) clusters along MD simulation. Dots represent 500 lowest energy structures, which entered into the second phase of optimizations.

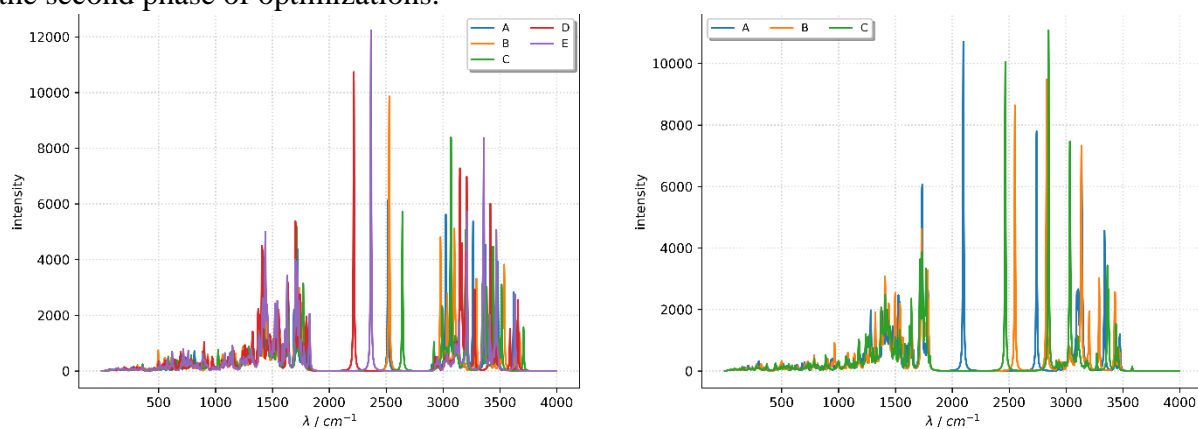

Fig. S9. IR spectra of the top structures of Lid:Cou:La (left) and Lid:Cou:Le (right).

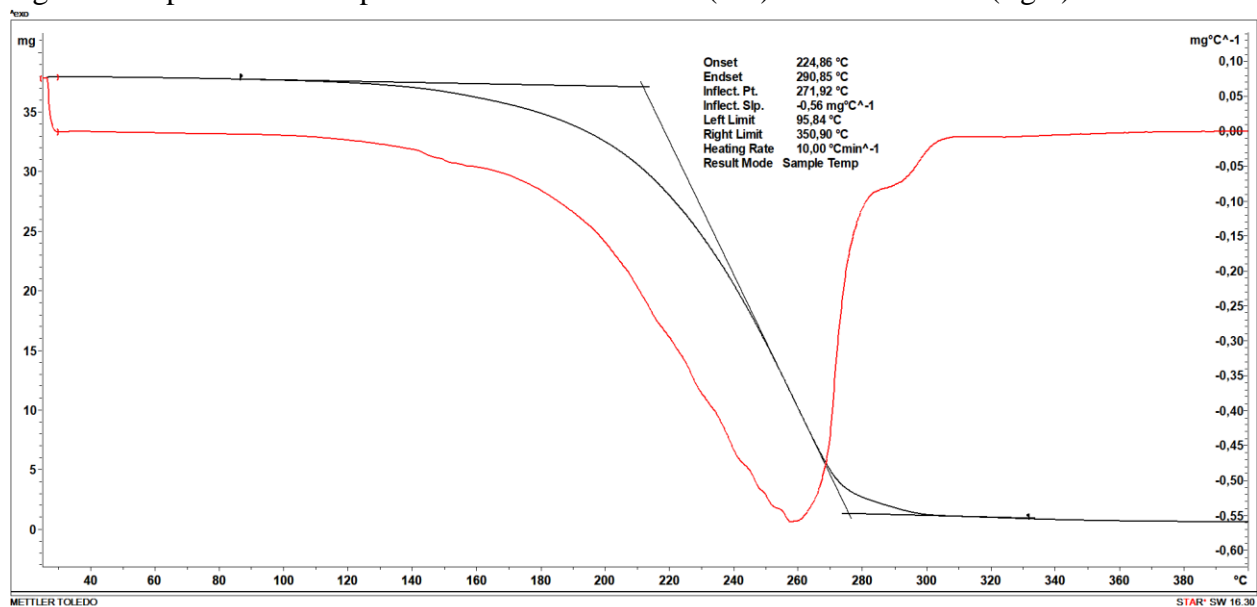

Fig. S10. TG (black) and dTG (red) curves of Lid:Cou:La

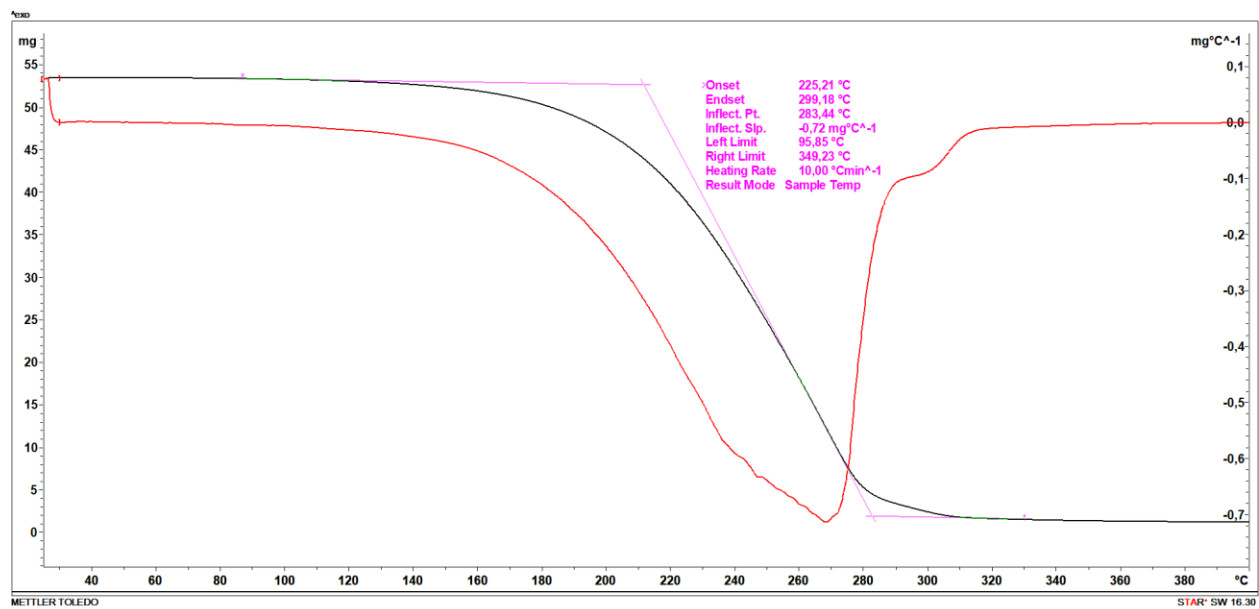

Fig S11. TG (black) and dTG (red) curves of Lid:Cou:Le

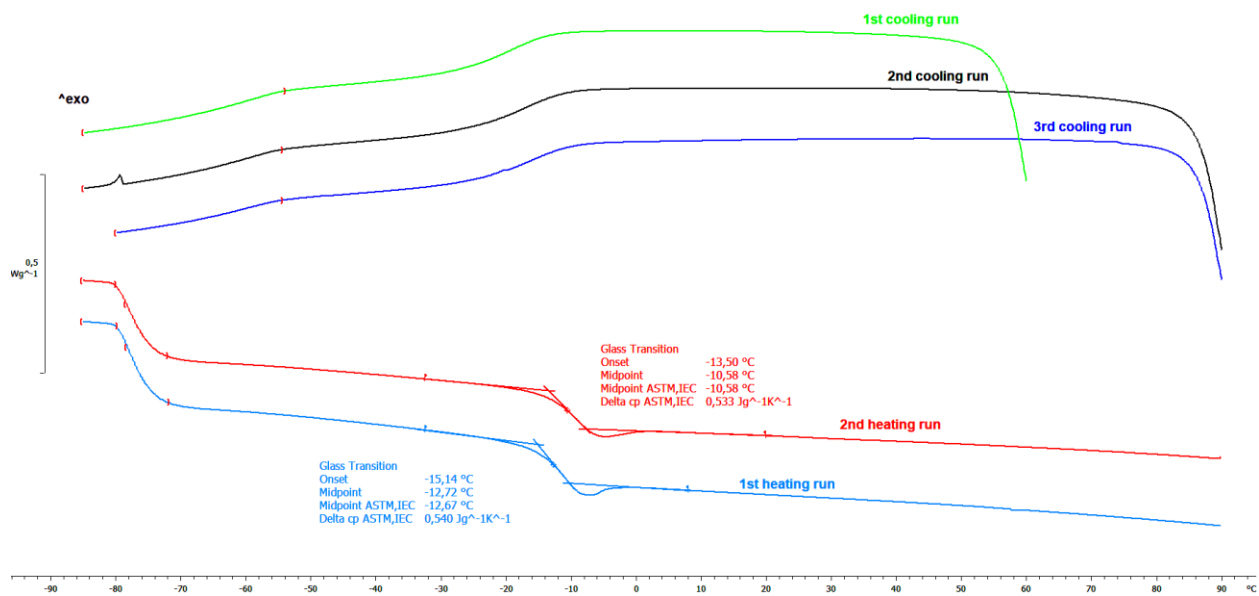

Fig S12. Low-temperature DSC curves of Lid:Cou:La.

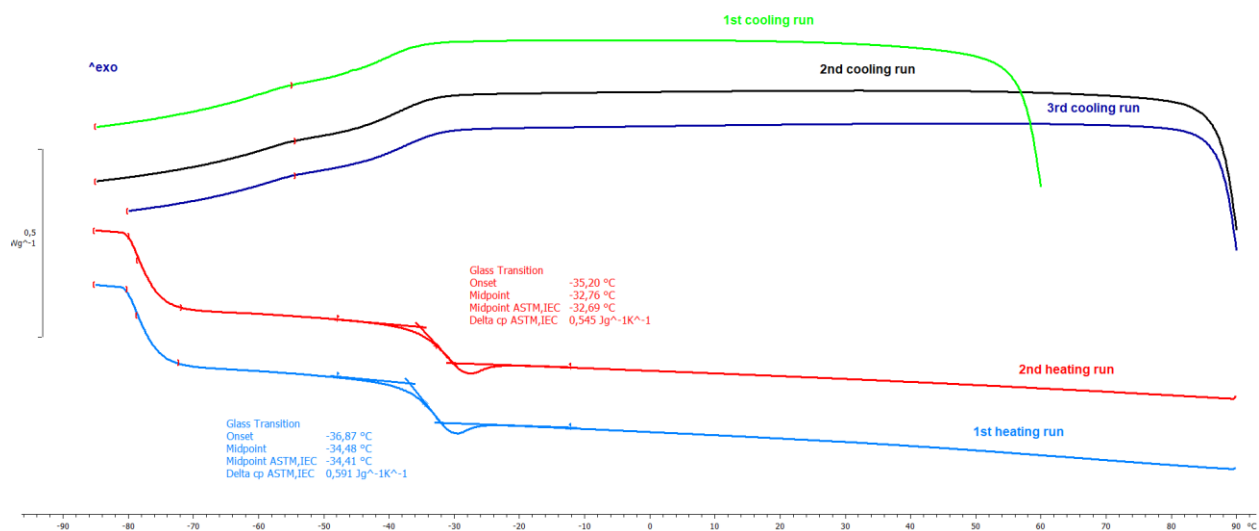

Fig S13. Low-temperature DSC curves of Lid:Cou:Le.

Table S10. B3LYP/aug-cc-pVDZ optimized geometry of Le.

16

|   |           |           |           |
|---|-----------|-----------|-----------|
| C | 2.586901  | -1.056244 | 1.621691  |
| C | 1.793177  | -0.058896 | 0.807625  |
| O | 2.237593  | 1.030955  | 0.522532  |
| C | 0.409255  | -0.502256 | 0.369371  |
| C | -0.331617 | 0.545937  | -0.443253 |
| C | -1.702632 | 0.092778  | -0.870786 |
| O | -2.209445 | -0.972890 | -0.625608 |
| O | -2.336472 | 1.047337  | -1.594341 |
| H | 3.555760  | -0.638021 | 1.880103  |
| H | 2.044514  | -1.318667 | 2.532422  |
| H | 2.723851  | -1.981464 | 1.058046  |
| H | 0.507601  | -1.433727 | -0.194675 |
| H | -0.162212 | -0.780013 | 1.259168  |
| H | -0.438492 | 1.476423  | 0.116965  |
| H | 0.230978  | 0.822820  | -1.336496 |
| H | -3.204761 | 0.692929  | -1.835766 |

Table S11. B3LYP/aug-cc-pVDZ optimized geometry of Lid.

39

|   |          |          |          |
|---|----------|----------|----------|
| C | 3.344639 | 2.395921 | 1.160599 |
|---|----------|----------|----------|

|   |           |           |           |
|---|-----------|-----------|-----------|
| C | 2.281810  | 1.415581  | 1.642920  |
| N | 2.568020  | 0.025810  | 1.278103  |
| C | 3.613940  | -0.578752 | 2.103476  |
| C | 4.307515  | -1.765472 | 1.442222  |
| C | 1.375724  | -0.783981 | 1.224508  |
| C | 0.437523  | -0.429181 | 0.061616  |
| O | 0.795309  | 0.153595  | -0.939427 |
| N | -0.842986 | -0.891160 | 0.255034  |
| C | -1.935919 | -0.723362 | -0.644223 |
| C | -3.063999 | -0.022293 | -0.188750 |
| C | -3.102681 | 0.571733  | 1.194912  |
| C | -4.150789 | 0.122863  | -1.046349 |
| C | -4.118182 | -0.404904 | -2.329243 |
| C | -2.999068 | -1.100739 | -2.759353 |
| C | -1.893855 | -1.285613 | -1.928532 |
| C | -0.716508 | -2.084444 | -2.411894 |
| H | 3.059920  | 3.414995  | 1.427434  |
| H | 4.321414  | 2.204160  | 1.605327  |
| H | 3.443971  | 2.334734  | 0.077651  |
| H | 2.139909  | 1.513436  | 2.733700  |
| H | 1.336172  | 1.689733  | 1.177410  |
| H | 4.361394  | 0.188604  | 2.297820  |
| H | 3.217655  | -0.877147 | 3.090659  |
| H | 5.113296  | -2.129452 | 2.081641  |
| H | 3.630597  | -2.602658 | 1.269023  |
| H | 4.730907  | -1.471370 | 0.482252  |
| H | 1.657825  | -1.827571 | 1.074647  |
| H | 0.803480  | -0.755740 | 2.172785  |
| H | -1.072306 | -1.179384 | 1.192273  |
| H | -2.249979 | 1.229275  | 1.372509  |
| H | -4.012463 | 1.151844  | 1.337687  |
| H | -3.084677 | -0.196143 | 1.974309  |
| H | -5.023564 | 0.664843  | -0.705870 |
| H | -4.965684 | -0.278895 | -2.989502 |
| H | -2.979690 | -1.525228 | -3.754731 |
| H | 0.128719  | -1.434763 | -2.640631 |
| H | -0.379245 | -2.791491 | -1.652009 |
| H | -0.978144 | -2.646386 | -3.307007 |

Table S12. B3LYP/aug-cc-pVDZ optimized geometry of LidH.

40

|   |          |          |          |
|---|----------|----------|----------|
| C | 3.318184 | 2.458326 | 1.469690 |
| C | 2.366582 | 1.433828 | 2.058662 |
| N | 2.462611 | 0.080247 | 1.379335 |

|   |           |           |           |
|---|-----------|-----------|-----------|
| C | 3.731361  | -0.668336 | 1.718869  |
| C | 4.059430  | -1.753272 | 0.708908  |
| C | 1.216485  | -0.723919 | 1.575214  |
| C | 0.329671  | -0.444038 | 0.342744  |
| O | 0.853295  | 0.111116  | -0.616200 |
| N | -0.935386 | -0.869998 | 0.422375  |
| C | -1.934125 | -0.738975 | -0.610083 |
| C | -3.056564 | 0.049884  | -0.324756 |
| C | -3.205721 | 0.762720  | 0.993476  |
| C | -4.039729 | 0.159798  | -1.303597 |
| C | -3.904748 | -0.491530 | -2.521454 |
| C | -2.788886 | -1.274386 | -2.773038 |
| C | -1.781278 | -1.424184 | -1.820691 |
| C | -0.595422 | -2.302803 | -2.109333 |
| H | 3.137887  | 3.415604  | 1.957120  |
| H | 4.365544  | 2.208539  | 1.627767  |
| H | 3.141904  | 2.594559  | 0.402459  |
| H | 2.542399  | 1.264009  | 3.120216  |
| H | 1.337280  | 1.761362  | 1.928224  |
| H | 4.526025  | 0.071242  | 1.749423  |
| H | 3.601929  | -1.064561 | 2.725054  |
| H | 5.000925  | -2.220089 | 0.994691  |
| H | 3.307335  | -2.539960 | 0.669239  |
| H | 4.183790  | -1.341146 | -0.292493 |
| H | 1.471132  | -1.780339 | 1.608551  |
| H | 0.746297  | -0.447602 | 2.516088  |
| H | -1.247138 | -1.227656 | 1.313448  |
| H | -2.364265 | 1.430180  | 1.190029  |
| H | -4.112575 | 1.362780  | 1.002955  |
| H | -3.274886 | 0.065684  | 1.833732  |
| H | -4.914272 | 0.765325  | -1.108259 |
| H | -4.675586 | -0.394189 | -3.273251 |
| H | -2.696454 | -1.791381 | -3.718501 |
| H | 0.292402  | -1.707204 | -2.327607 |
| H | -0.359965 | -2.953667 | -1.265269 |
| H | -0.793256 | -2.937254 | -2.970304 |
| H | 2.422999  | 0.267590  | 0.355926  |

Table S13. B3LYP/aug-cc-pVDZ optimized geometry of deCou.

20

|   |          |           |          |
|---|----------|-----------|----------|
| C | 0.480513 | 1.807961  | 2.320590 |
| C | 0.676891 | 0.710372  | 1.307824 |
| C | 1.919405 | 0.144680  | 1.158773 |
| C | 2.174139 | -0.901475 | 0.215325 |

|   |           |           |           |
|---|-----------|-----------|-----------|
| O | 3.239613  | -1.459844 | 0.015703  |
| O | 1.093878  | -1.319354 | -0.547308 |
| C | -0.167661 | -0.776788 | -0.427358 |
| C | -1.147207 | -1.281387 | -1.242583 |
| C | -2.499860 | -0.784929 | -1.197381 |
| O | -3.418009 | -1.225301 | -1.929875 |
| C | -2.726680 | 0.277910  | -0.228882 |
| C | -1.732339 | 0.761874  | 0.570925  |
| C | -0.404664 | 0.261734  | 0.514147  |
| H | 1.412901  | 2.026253  | 2.839687  |
| H | 0.130508  | 2.726708  | 1.844888  |
| H | -0.268536 | 1.529467  | 3.065067  |
| H | 2.764386  | 0.465816  | 1.749979  |
| H | -0.909262 | -2.072199 | -1.940757 |
| H | -3.732522 | 0.675060  | -0.168016 |
| H | -1.959494 | 1.554445  | 1.274252  |

Table S14. B3LYP/aug-cc-pVDZ optimized geometry of La.

12

|   |           |           |           |
|---|-----------|-----------|-----------|
| C | 1.210592  | 1.452062  | -0.467723 |
| C | 0.749209  | 0.225566  | 0.320414  |
| H | 0.756037  | 0.468714  | 1.389707  |
| O | 1.609714  | -0.868176 | 0.087965  |
| C | -0.676180 | -0.168479 | -0.025318 |
| O | -0.978243 | -1.238318 | -0.494474 |
| O | -1.571601 | 0.796004  | 0.253992  |
| H | 1.157549  | 1.259189  | -1.539220 |
| H | 0.602156  | 2.323057  | -0.229335 |
| H | 2.246724  | 1.663102  | -0.209058 |
| H | 1.069046  | -1.595832 | -0.250298 |
| H | -2.448001 | 0.463112  | 0.009348  |

Table S15. B3LYP/cc-pVDZ optimized geometry of Lid:Cou:La structure A.

225

|   |          |           |          |
|---|----------|-----------|----------|
| C | 0.805119 | -2.195849 | 6.052705 |
| C | 0.877857 | -1.495253 | 4.722769 |
| C | 0.933212 | -0.121173 | 4.663946 |
| C | 0.998252 | 0.578221  | 3.417845 |
| O | 1.050532 | 1.808650  | 3.282834 |

|   |           |           |           |
|---|-----------|-----------|-----------|
| O | 1.011150  | -0.156830 | 2.264533  |
| C | 0.953604  | -1.535999 | 2.276247  |
| C | 0.969259  | -2.161746 | 1.042267  |
| C | 0.917099  | -3.579079 | 0.954962  |
| O | 0.933091  | -4.204353 | -0.188897 |
| C | 0.848378  | -4.308750 | 2.189965  |
| C | 0.834717  | -3.662274 | 3.407423  |
| C | 0.888068  | -2.245486 | 3.501684  |
| H | 1.659653  | -2.879374 | 6.185011  |
| H | 0.806112  | -1.476522 | 6.882718  |
| H | -0.108669 | -2.807932 | 6.125504  |
| H | 0.923979  | 0.494683  | 5.562603  |
| H | 1.012022  | -1.564658 | 0.132605  |
| H | 0.800563  | -5.397874 | 2.131419  |
| H | 0.779621  | -4.252454 | 4.324176  |
| C | 4.584565  | 0.347121  | -3.499974 |
| C | 3.838132  | 1.614885  | -3.108141 |
| N | 2.546446  | 1.368850  | -2.362943 |
| C | 1.521996  | 0.563395  | -3.139098 |
| C | 1.253458  | 1.093160  | -4.537893 |
| C | 2.755053  | 0.747988  | -1.013304 |
| C | 3.636312  | 1.637813  | -0.129133 |
| O | 3.354070  | 2.818435  | 0.037519  |
| N | 4.706529  | 0.999031  | 0.427817  |
| C | 5.585667  | 1.594162  | 1.390293  |
| C | 6.383686  | 2.705366  | 1.043949  |
| C | 6.368629  | 3.301357  | -0.340112 |
| C | 7.230655  | 3.238969  | 2.026752  |
| C | 7.300451  | 2.683253  | 3.303690  |
| C | 6.520568  | 1.570286  | 3.618993  |
| C | 5.651958  | 1.010274  | 2.673785  |
| C | 4.810110  | -0.192114 | 3.021158  |
| H | 4.860944  | -0.272746 | -2.633747 |
| H | 4.010890  | -0.274563 | -4.204259 |
| H | 5.514540  | 0.645495  | -4.009094 |
| H | 4.441229  | 2.255945  | -2.453808 |
| H | 3.581522  | 2.230032  | -3.980047 |
| H | 1.852724  | -0.481650 | -3.155427 |
| H | 0.609662  | 0.611637  | -2.530754 |
| H | 0.973694  | 2.156185  | -4.529673 |
| H | 2.113654  | 0.970926  | -5.212181 |
| H | 0.423456  | 0.503844  | -4.953608 |
| H | 1.767108  | 0.694933  | -0.535178 |
| H | 3.152609  | -0.265981 | -1.140637 |
| H | 4.786918  | -0.009898 | 0.274503  |
| H | 5.428786  | 3.841933  | -0.531182 |

|   |           |           |           |
|---|-----------|-----------|-----------|
| H | 7.209777  | 3.996328  | -0.475146 |
| H | 6.448389  | 2.515828  | -1.109469 |
| H | 7.852225  | 4.101350  | 1.773296  |
| H | 7.968549  | 3.114798  | 4.052759  |
| H | 6.574301  | 1.127882  | 4.616706  |
| H | 3.759184  | -0.043804 | 2.731116  |
| H | 5.161465  | -1.096609 | 2.496964  |
| H | 4.847866  | -0.397383 | 4.100318  |
| H | 2.093249  | 2.302938  | -2.192729 |
| C | -2.304810 | 2.999638  | 3.890727  |
| C | -3.319972 | 3.773714  | 3.058484  |
| N | -4.537418 | 3.013264  | 2.728583  |
| C | -5.512716 | 3.834823  | 2.010475  |
| C | -6.942056 | 3.294163  | 2.080882  |
| C | -4.347053 | 1.687614  | 2.152009  |
| C | -3.742633 | 1.642377  | 0.738903  |
| O | -2.667546 | 2.223690  | 0.501091  |
| N | -4.437739 | 0.938703  | -0.182212 |
| C | -4.040093 | 0.769167  | -1.552101 |
| C | -4.791561 | 1.432698  | -2.544861 |
| C | -5.967510 | 2.303507  | -2.172532 |
| C | -4.425303 | 1.254152  | -3.884359 |
| C | -3.346606 | 0.435072  | -4.224825 |
| C | -2.628149 | -0.228918 | -3.231247 |
| C | -2.964205 | -0.079485 | -1.875485 |
| C | -2.198591 | -0.826339 | -0.812087 |
| H | -1.498195 | 3.672869  | 4.218246  |
| H | -2.778532 | 2.555960  | 4.782766  |
| H | -1.828092 | 2.199128  | 3.305535  |
| H | -3.661329 | 4.649211  | 3.638300  |
| H | -2.817702 | 4.167834  | 2.152483  |
| H | -5.489455 | 4.832307  | 2.478954  |
| H | -5.223176 | 3.997022  | 0.945673  |
| H | -7.058408 | 2.333430  | 1.555579  |
| H | -7.241264 | 3.147482  | 3.131837  |
| H | -7.638537 | 4.012797  | 1.618358  |
| H | -3.660976 | 1.117019  | 2.796517  |
| H | -5.306556 | 1.151469  | 2.154466  |
| H | -5.331356 | 0.524000  | 0.102737  |
| H | -5.669901 | 3.119123  | -1.493135 |
| H | -6.419248 | 2.753872  | -3.068288 |
| H | -6.749429 | 1.727121  | -1.650051 |
| H | -4.995957 | 1.762851  | -4.665512 |
| H | -3.070827 | 0.302742  | -5.273701 |
| H | -1.800427 | -0.884180 | -3.510460 |
| H | -2.852835 | -1.107717 | 0.025631  |



|   |            |           |           |
|---|------------|-----------|-----------|
| H | -1.751595  | -1.745766 | -1.214477 |
| H | -1.391582  | -0.204909 | -0.390386 |
| C | -9.492724  | -3.417904 | 3.636165  |
| C | -10.468236 | -2.346124 | 3.152989  |
| N | -10.054793 | -1.726526 | 1.884835  |
| C | -11.168982 | -1.171242 | 1.097629  |
| C | -11.982918 | -0.045648 | 1.750601  |
| C | -8.913395  | -0.820015 | 1.989935  |
| C | -7.815235  | -1.057188 | 0.942569  |
| O | -6.915558  | -0.223546 | 0.791417  |
| N | -7.929017  | -2.227541 | 0.277015  |
| C | -7.071114  | -2.727459 | -0.755271 |
| C | -7.611810  | -2.881510 | -2.048539 |
| C | -9.038890  | -2.488896 | -2.346797 |
| C | -6.789281  | -3.404432 | -3.053299 |
| C | -5.466278  | -3.755129 | -2.781985 |
| C | -4.948454  | -3.603977 | -1.495713 |
| C | -5.744178  | -3.097741 | -0.456322 |
| C | -5.190417  | -2.981004 | 0.941684  |
| H | -9.850371  | -3.860672 | 4.579660  |
| H | -9.391748  | -4.223978 | 2.891808  |
| H | -8.488134  | -3.007146 | 3.828413  |
| H | -11.452167 | -2.811421 | 2.978287  |
| H | -10.618403 | -1.590874 | 3.953326  |
| H | -10.748718 | -0.815804 | 0.141700  |
| H | -11.842043 | -2.008378 | 0.843901  |
| H | -12.762656 | 0.304541  | 1.054969  |
| H | -12.486190 | -0.385144 | 2.669831  |
| H | -11.356982 | 0.823977  | 2.008695  |
| H | -9.190598  | 0.246394  | 1.915823  |
| H | -8.422237  | -0.930894 | 2.969935  |
| H | -8.798692  | -2.716026 | 0.505295  |
| H | -9.765488  | -3.096879 | -1.779232 |
| H | -9.231735  | -1.434800 | -2.086877 |
| H | -9.264685  | -2.620901 | -3.414550 |
| H | -7.192429  | -3.525821 | -4.061737 |
| H | -4.831383  | -4.152075 | -3.576442 |
| H | -3.910757  | -3.884952 | -1.298278 |
| H | -5.877566  | -3.422570 | 1.682167  |
| H | -4.221432  | -3.492949 | 1.020097  |
| H | -5.048497  | -1.926857 | 1.227947  |
| C | 2.087965   | 7.155117  | -4.955896 |
| C | 1.739260   | 6.076047  | -3.931911 |
| H | 0.761328   | 5.629975  | -4.180393 |
| O | 1.737997   | 6.625388  | -2.623019 |
| C | 2.759261   | 4.928071  | -3.999629 |

|   |           |           |           |
|---|-----------|-----------|-----------|
| O | 2.902264  | 4.199650  | -4.961689 |
| O | 3.495204  | 4.808198  | -2.888464 |
| H | 3.046644  | 7.630463  | -4.692613 |
| H | 2.174699  | 6.715498  | -5.960634 |
| H | 1.309705  | 7.932736  | -4.962357 |
| H | 0.951046  | 6.277175  | -2.132633 |
| H | 3.090408  | 5.469696  | -2.270824 |
| C | -2.177970 | 4.743979  | -2.255134 |
| C | -1.115736 | 4.649417  | -1.157989 |
| H | -1.605366 | 4.451656  | -0.190532 |
| O | -0.399230 | 5.865965  | -1.103924 |
| C | -0.185971 | 3.464541  | -1.451749 |
| O | 0.868849  | 3.600974  | -2.061371 |
| O | -0.591394 | 2.259688  | -1.077292 |
| H | -2.853902 | 5.582814  | -2.032191 |
| H | -1.704114 | 4.929765  | -3.232329 |
| H | -2.763841 | 3.814866  | -2.319002 |
| H | 0.021021  | 5.930874  | -0.204243 |
| H | -1.442466 | 2.274122  | -0.537753 |
| C | 7.020846  | -6.037470 | -3.008471 |
| C | 5.969768  | -4.929370 | -3.000908 |
| N | 4.921842  | -5.113148 | -1.979059 |
| C | 3.945442  | -6.148679 | -2.368140 |
| C | 3.152587  | -6.716879 | -1.192923 |
| C | 4.285979  | -3.836230 | -1.651606 |
| C | 5.074291  | -3.011107 | -0.631361 |
| O | 4.870573  | -1.799804 | -0.487501 |
| N | 5.953526  | -3.745269 | 0.095221  |
| C | 6.722951  | -3.321991 | 1.220562  |
| C | 7.716984  | -2.331607 | 1.079714  |
| C | 8.018174  | -1.691140 | -0.251209 |
| C | 8.450092  | -1.969484 | 2.219621  |
| C | 8.224810  | -2.584398 | 3.450367  |
| C | 7.255272  | -3.582213 | 3.562564  |
| C | 6.487365  | -3.964324 | 2.455975  |
| C | 5.431111  | -5.035759 | 2.582335  |
| H | 6.591011  | -7.024314 | -3.240836 |
| H | 7.786226  | -5.826212 | -3.772563 |
| H | 7.523239  | -6.109206 | -2.030197 |
| H | 6.472966  | -3.972102 | -2.790452 |
| H | 5.515071  | -4.824054 | -4.010443 |
| H | 3.252150  | -5.757429 | -3.144801 |
| H | 4.510090  | -6.964343 | -2.843518 |
| H | 2.485469  | -5.973226 | -0.729259 |
| H | 2.518131  | -7.547769 | -1.543452 |
| H | 3.834709  | -7.112929 | -0.422343 |

|   |           |           |           |
|---|-----------|-----------|-----------|
| H | 4.100165  | -3.194891 | -2.534645 |
| H | 3.300965  | -4.016114 | -1.193966 |
| H | 5.902791  | -4.739878 | -0.140679 |
| H | 8.099609  | -2.449361 | -1.047080 |
| H | 7.217559  | -0.998538 | -0.553021 |
| H | 8.963899  | -1.132463 | -0.209573 |
| H | 9.216930  | -1.196837 | 2.129331  |
| H | 8.811678  | -2.290431 | 4.323421  |
| H | 7.080743  | -4.070504 | 4.524500  |
| H | 5.677051  | -5.930717 | 1.983572  |
| H | 5.329193  | -5.361023 | 3.627533  |
| H | 4.446591  | -4.681393 | 2.236497  |
| C | 3.120704  | 4.668600  | 3.160954  |
| C | 1.653497  | 5.070053  | 3.347116  |
| H | 1.595512  | 6.128401  | 3.640702  |
| O | 1.000857  | 4.342837  | 4.372634  |
| C | 0.912204  | 5.004575  | 2.003634  |
| O | 0.749797  | 6.011204  | 1.326877  |
| O | 0.445223  | 3.835104  | 1.571985  |
| H | 3.615821  | 5.325412  | 2.429239  |
| H | 3.641750  | 4.751186  | 4.126890  |
| H | 3.210436  | 3.635061  | 2.793706  |
| H | 1.126241  | 3.387710  | 4.210619  |
| H | 0.683740  | 3.068887  | 2.153367  |
| C | -1.635996 | -4.424366 | -4.137976 |
| C | -0.618524 | -4.260116 | -3.021975 |
| H | 0.083324  | -5.121376 | -3.037899 |
| O | -1.306558 | -4.221107 | -1.775590 |
| C | 0.248341  | -2.994389 | -3.218829 |
| O | 0.177532  | -2.290719 | -4.211876 |
| O | 1.102394  | -2.706291 | -2.236044 |
| H | -2.195581 | -5.360399 | -3.990851 |
| H | -2.343772 | -3.581719 | -4.135942 |
| H | -1.138977 | -4.445881 | -5.117735 |
| H | -0.641489 | -4.364206 | -1.065136 |
| H | 1.026209  | -3.331240 | -1.411920 |

Table S16. B3LYP/cc-pVDZ optimized geometry of Lid:Cou:La structure B.

225

|   |           |           |          |
|---|-----------|-----------|----------|
| C | 0.898771  | 3.386346  | 7.313837 |
| C | 0.533446  | 2.551762  | 6.115964 |
| C | -0.449575 | 1.589403  | 6.215794 |
| C | -0.814191 | 0.775040  | 5.103244 |
| O | -1.680902 | -0.117312 | 5.100180 |
| O | -0.167075 | 0.978632  | 3.913581 |

|   |           |           |           |
|---|-----------|-----------|-----------|
| C | 0.830030  | 1.919929  | 3.769253  |
| C | 1.418370  | 2.010229  | 2.519337  |
| C | 2.457503  | 2.953666  | 2.279775  |
| O | 3.037243  | 3.056690  | 1.129034  |
| C | 2.833046  | 3.802277  | 3.380651  |
| C | 2.232180  | 3.690686  | 4.614828  |
| C | 1.203091  | 2.740264  | 4.864203  |
| H | 0.291001  | 3.116782  | 8.187914  |
| H | 1.960893  | 3.252474  | 7.576080  |
| H | 0.752712  | 4.459182  | 7.107791  |
| H | -0.983579 | 1.403275  | 7.146805  |
| H | 1.091428  | 1.353549  | 1.712765  |
| H | 3.628141  | 4.529926  | 3.207270  |
| H | 2.557593  | 4.344094  | 5.426567  |
| C | -0.463190 | -4.340384 | -1.462446 |
| C | -0.655522 | -2.830060 | -1.476846 |
| N | -0.361669 | -2.202292 | -0.128626 |
| C | 1.125421  | -2.255225 | 0.194632  |
| C | 1.433693  | -2.308801 | 1.682170  |
| C | -0.829778 | -0.787741 | -0.061077 |
| C | -2.347641 | -0.635471 | -0.147081 |
| O | -3.120347 | -1.582471 | 0.007930  |
| N | -2.719388 | 0.651082  | -0.362475 |
| C | -4.071627 | 1.129795  | -0.387472 |
| C | -4.617754 | 1.580485  | -1.606763 |
| C | -3.899639 | 1.428609  | -2.927549 |
| C | -5.908272 | 2.135985  | -1.586377 |
| C | -6.641894 | 2.212778  | -0.404358 |
| C | -6.092910 | 1.735586  | 0.788582  |
| C | -4.801259 | 1.194666  | 0.822157  |
| C | -4.215244 | 0.697680  | 2.119255  |
| H | -1.073007 | -4.816891 | -0.678291 |
| H | -0.796390 | -4.737293 | -2.434079 |
| H | 0.588603  | -4.634063 | -1.331766 |
| H | 0.000744  | -2.333670 | -2.203982 |
| H | -1.697364 | -2.578663 | -1.704250 |
| H | 1.536716  | -3.133910 | -0.312476 |
| H | 1.571698  | -1.374187 | -0.287712 |
| H | 1.068023  | -1.430534 | 2.233566  |
| H | 1.006654  | -3.210341 | 2.144997  |
| H | 2.527961  | -2.362834 | 1.778153  |
| H | -0.513808 | -0.386418 | 0.910372  |
| H | -0.353051 | -0.231453 | -0.878770 |
| H | -1.993285 | 1.329143  | -0.621742 |
| H | -2.843982 | 1.152121  | -2.817239 |
| H | -4.392311 | 0.640760  | -3.524714 |

|   |           |           |           |
|---|-----------|-----------|-----------|
| H | -3.957947 | 2.359614  | -3.513582 |
| H | -6.343690 | 2.492626  | -2.523258 |
| H | -7.647116 | 2.640572  | -0.410540 |
| H | -6.669584 | 1.789550  | 1.715145  |
| H | -4.110388 | -0.398396 | 2.108570  |
| H | -3.206408 | 1.103328  | 2.294815  |
| H | -4.853055 | 0.975789  | 2.970348  |
| H | -0.883171 | -2.742240 | 0.606552  |
| C | 8.654932  | -0.270395 | 3.188247  |
| C | 7.159474  | -0.439645 | 2.929692  |
| N | 6.780502  | -0.235901 | 1.521217  |
| C | 6.792229  | 1.186030  | 1.113624  |
| C | 7.130878  | 1.370414  | -0.362863 |
| C | 5.501848  | -0.877621 | 1.219537  |
| C | 5.615262  | -2.334529 | 0.772546  |
| O | 4.608976  | -3.052527 | 0.711206  |
| N | 6.869373  | -2.715574 | 0.433485  |
| C | 7.261486  | -3.953407 | -0.160582 |
| C | 7.086994  | -5.167255 | 0.536077  |
| C | 6.501978  | -5.210243 | 1.924628  |
| C | 7.503439  | -6.350215 | -0.092585 |
| C | 8.091132  | -6.330575 | -1.356632 |
| C | 8.277418  | -5.115676 | -2.018158 |
| C | 7.864499  | -3.910257 | -1.436999 |
| C | 8.046775  | -2.598817 | -2.162698 |
| H | 9.240808  | -0.981048 | 2.583061  |
| H | 9.008426  | 0.745455  | 2.951341  |
| H | 8.879349  | -0.456842 | 4.250953  |
| H | 6.871168  | -1.467917 | 3.202466  |
| H | 6.576011  | 0.233659  | 3.596250  |
| H | 5.818390  | 1.665107  | 1.340443  |
| H | 7.544808  | 1.708312  | 1.722840  |
| H | 7.002378  | 2.424943  | -0.649899 |
| H | 8.166740  | 1.056251  | -0.571223 |
| H | 6.463518  | 0.778806  | -1.009652 |
| H | 4.789338  | -0.845021 | 2.067563  |
| H | 5.001216  | -0.355990 | 0.389087  |
| H | 7.526690  | -1.931722 | 0.464111  |
| H | 5.424385  | -4.985489 | 1.910249  |
| H | 6.650388  | -6.199870 | 2.379908  |
| H | 6.974109  | -4.456781 | 2.576554  |
| H | 7.371895  | -7.299559 | 0.432226  |
| H | 8.412575  | -7.263595 | -1.824993 |
| H | 8.742811  | -5.096018 | -3.006634 |
| H | 7.085177  | -2.076211 | -2.290012 |
| H | 8.720715  | -1.914160 | -1.618029 |

|   |           |           |           |
|---|-----------|-----------|-----------|
| H | 8.484111  | -2.762840 | -3.157978 |
| C | -0.613201 | 6.742280  | 3.226448  |
| C | -1.005314 | 5.340407  | 2.765499  |
| N | -2.000374 | 5.329918  | 1.675029  |
| C | -3.351371 | 5.708758  | 2.127790  |
| C | -4.256984 | 6.181481  | 0.992986  |
| C | -1.984256 | 4.060091  | 0.946922  |
| C | -1.136857 | 4.082134  | -0.328307 |
| O | -0.924812 | 3.025804  | -0.954425 |
| N | -0.710804 | 5.304637  | -0.685222 |
| C | 0.033697  | 5.677675  | -1.852417 |
| C | 1.341337  | 6.175921  | -1.677023 |
| C | 1.980678  | 6.235264  | -0.311151 |
| C | 2.039192  | 6.608982  | -2.812177 |
| C | 1.460619  | 6.537985  | -4.080076 |
| C | 0.168572  | 6.036169  | -4.230410 |
| C | -0.572670 | 5.602359  | -3.122327 |
| C | -1.976486 | 5.082343  | -3.299039 |
| H | 0.182886  | 6.673169  | 3.984414  |
| H | -0.230356 | 7.342540  | 2.384994  |
| H | -1.452211 | 7.292915  | 3.679894  |
| H | -0.104255 | 4.828661  | 2.394419  |
| H | -1.367136 | 4.742196  | 3.630079  |
| H | -3.831655 | 4.870014  | 2.676946  |
| H | -3.238303 | 6.528007  | 2.852233  |
| H | -3.816791 | 7.049704  | 0.476618  |
| H | -4.439014 | 5.393232  | 0.244943  |
| H | -5.239143 | 6.479788  | 1.393169  |
| H | -1.621020 | 3.216855  | 1.563036  |
| H | -3.000757 | 3.785099  | 0.624320  |
| H | -0.979192 | 6.013877  | 0.005348  |
| H | 1.956005  | 5.255369  | 0.191292  |
| H | 3.034602  | 6.535317  | -0.391345 |
| H | 1.471849  | 6.959118  | 0.349646  |
| H | 3.052623  | 6.998702  | -2.693785 |
| H | 2.020007  | 6.876642  | -4.954932 |
| H | -0.285327 | 5.985038  | -5.222804 |
| H | -2.667409 | 5.523142  | -2.562847 |
| H | -2.354316 | 5.311300  | -4.305497 |
| H | -2.013041 | 3.990022  | -3.160843 |
| C | 4.543703  | 3.644397  | -3.221296 |
| C | 3.916175  | 3.252845  | -1.893903 |
| H | 2.882365  | 3.647926  | -1.849420 |
| O | 4.713145  | 3.794286  | -0.846986 |
| C | 3.787818  | 1.723085  | -1.752784 |
| O | 4.098750  | 0.961843  | -2.670317 |

|   |           |           |           |
|---|-----------|-----------|-----------|
| O | 3.337014  | 1.240960  | -0.609229 |
| H | 5.546821  | 3.204222  | -3.321056 |
| H | 3.928074  | 3.300434  | -4.063608 |
| H | 4.629568  | 4.739626  | -3.264704 |
| H | 4.208054  | 3.736520  | -0.008220 |
| H | 3.140815  | 1.970733  | 0.101033  |
| C | 0.770744  | 1.510184  | -5.919487 |
| C | 1.238304  | 0.719900  | -4.695124 |
| H | 2.291179  | 0.985112  | -4.474800 |
| O | 1.086110  | -0.645635 | -4.976633 |
| C | 0.436739  | 1.135906  | -3.458428 |
| O | -0.344399 | 0.408782  | -2.866021 |
| O | 0.687983  | 2.398140  | -3.085993 |
| H | 0.855919  | 2.593059  | -5.749534 |
| H | 1.385837  | 1.228618  | -6.787062 |
| H | -0.277612 | 1.259074  | -6.147401 |
| H | 1.486179  | -1.146839 | -4.240951 |
| H | 0.114665  | 2.630562  | -2.305196 |
| C | -4.862641 | -3.079065 | -4.975820 |
| C | -6.282656 | -2.859123 | -4.452627 |
| N | -6.404188 | -1.664492 | -3.604140 |
| C | -7.747805 | -1.066214 | -3.617565 |
| C | -7.991824 | -0.213515 | -4.863796 |
| C | -5.837829 | -1.826127 | -2.278647 |
| C | -6.546251 | -2.812645 | -1.328105 |
| O | -7.622062 | -3.337719 | -1.587671 |
| N | -5.864742 | -3.010539 | -0.149719 |
| C | -6.281558 | -3.894049 | 0.892309  |
| C | -7.472884 | -3.644927 | 1.606545  |
| C | -8.347318 | -2.459936 | 1.288961  |
| C | -7.826767 | -4.530117 | 2.635559  |
| C | -7.024055 | -5.624124 | 2.957535  |
| C | -5.846608 | -5.853653 | 2.243828  |
| C | -5.461232 | -5.001643 | 1.200115  |
| C | -4.202386 | -5.269757 | 0.412121  |
| H | -4.511088 | -2.200992 | -5.541029 |
| H | -4.142262 | -3.263783 | -4.161889 |
| H | -4.831857 | -3.958182 | -5.640524 |
| H | -6.951790 | -2.717956 | -5.315442 |
| H | -6.644878 | -3.764435 | -3.925962 |
| H | -8.537586 | -1.834288 | -3.513986 |
| H | -7.830976 | -0.422998 | -2.726450 |
| H | -8.999793 | 0.233569  | -4.832600 |
| H | -7.249720 | 0.598254  | -4.937708 |
| H | -7.927503 | -0.808134 | -5.789925 |
| H | -4.780002 | -2.124206 | -2.363041 |

|   |           |           |           |
|---|-----------|-----------|-----------|
| H | -5.823735 | -0.847661 | -1.772381 |
| H | -4.930197 | -2.604972 | -0.079286 |
| H | -7.746514 | -1.544516 | 1.163623  |
| H | -8.879866 | -2.620208 | 0.338256  |
| H | -9.084323 | -2.289178 | 2.087530  |
| H | -8.747728 | -4.346913 | 3.195216  |
| H | -7.316810 | -6.300369 | 3.764332  |
| H | -5.219659 | -6.716183 | 2.484184  |
| H | -4.405350 | -5.271714 | -0.671110 |
| H | -3.431873 | -4.505518 | 0.603351  |
| H | -3.772901 | -6.244927 | 0.684623  |
| C | -3.791109 | -3.066957 | 4.568128  |
| C | -2.311078 | -3.405435 | 4.370516  |
| H | -2.179710 | -4.495857 | 4.322245  |
| O | -1.493013 | -2.955690 | 5.437334  |
| C | -1.802745 | -2.879654 | 3.019552  |
| O | -1.597889 | -3.613827 | 2.060067  |
| O | -1.581012 | -1.573214 | 2.901580  |
| H | -3.940451 | -1.975046 | 4.607556  |
| H | -4.411248 | -3.477247 | 3.755848  |
| H | -4.132735 | -3.495773 | 5.522363  |
| H | -1.690545 | -2.017622 | 5.610399  |
| H | -1.673439 | -1.055122 | 3.757125  |
| C | 3.281922  | -4.729814 | -3.642624 |
| C | 3.837241  | -3.920585 | -2.480312 |
| H | 4.936053  | -4.013581 | -2.440128 |
| O | 3.255400  | -4.410294 | -1.276432 |
| C | 3.490254  | -2.431757 | -2.643628 |
| O | 2.353300  | -2.039697 | -2.883139 |
| O | 4.523550  | -1.621281 | -2.466622 |
| H | 2.194023  | -4.584479 | -3.715668 |
| H | 3.738047  | -4.418210 | -4.595759 |
| H | 3.493308  | -5.796652 | -3.478147 |
| H | 3.792524  | -4.063546 | -0.530856 |
| H | 4.239959  | -0.650616 | -2.545205 |

Table S17. B3LYP/cc-pVDZ optimized geometry of Lid:Cou:La structure C.

225

|   |          |          |           |
|---|----------|----------|-----------|
| C | 6.046978 | 1.119944 | -4.637735 |
| C | 4.885009 | 0.899474 | -3.707722 |
| C | 3.593070 | 1.038956 | -4.162048 |
| C | 2.466467 | 0.826415 | -3.305119 |
| O | 1.273310 | 0.920534 | -3.629468 |
| O | 2.704492 | 0.464012 | -2.010652 |
| C | 3.977679 | 0.347727 | -1.503800 |



|   |           |           |           |
|---|-----------|-----------|-----------|
| C | 4.071773  | 0.027571  | -0.159996 |
| C | 5.342796  | -0.113725 | 0.449030  |
| O | 5.464146  | -0.378354 | 1.726944  |
| C | 6.498878  | 0.050089  | -0.382778 |
| C | 6.377305  | 0.372296  | -1.719132 |
| C | 5.107550  | 0.544576  | -2.333890 |
| H | 5.705735  | 1.389128  | -5.646315 |
| H | 6.702053  | 1.924738  | -4.266286 |
| H | 6.667594  | 0.212094  | -4.712463 |
| H | 3.369900  | 1.314429  | -5.192236 |
| H | 3.163912  | -0.115699 | 0.424251  |
| H | 7.478825  | -0.091178 | 0.077131  |
| H | 7.280041  | 0.497848  | -2.319831 |
| C | -2.409213 | 1.813119  | 3.141150  |
| C | -1.788081 | 0.438741  | 2.944942  |
| N | -1.091417 | 0.300673  | 1.600646  |
| C | 0.411091  | 0.498555  | 1.675130  |
| C | 0.845501  | 1.797974  | 2.331465  |
| C | -1.357522 | -1.025869 | 0.958759  |
| C | -2.776313 | -1.102486 | 0.391275  |
| O | -3.683174 | -0.388469 | 0.832083  |
| N | -2.921510 | -2.013208 | -0.596959 |
| C | -4.177122 | -2.331477 | -1.214687 |
| C | -4.716432 | -3.614262 | -0.991682 |
| C | -4.001536 | -4.609799 | -0.110428 |
| C | -5.931255 | -3.941764 | -1.607422 |
| C | -6.591825 | -3.017780 | -2.417756 |
| C | -6.034543 | -1.757150 | -2.635295 |
| C | -4.814176 | -1.390190 | -2.047783 |
| C | -4.205904 | -0.039801 | -2.332415 |
| H | -3.164009 | 2.004386  | 2.364584  |
| H | -2.917205 | 1.833082  | 4.117320  |
| H | -1.667493 | 2.623666  | 3.121864  |
| H | -1.045466 | 0.186417  | 3.714102  |
| H | -2.574808 | -0.320596 | 2.970747  |
| H | 0.807846  | -0.379171 | 2.200435  |
| H | 0.752814  | 0.476316  | 0.631709  |
| H | 1.945689  | 1.821077  | 2.331518  |
| H | 0.488682  | 2.671604  | 1.766809  |
| H | 0.526893  | 1.868648  | 3.380936  |
| H | -0.622489 | -1.179758 | 0.163003  |
| H | -1.187808 | -1.799530 | 1.721640  |
| H | -2.098103 | -2.574497 | -0.854118 |
| H | -4.584084 | -5.537398 | -0.015794 |
| H | -3.009321 | -4.871160 | -0.514469 |
| H | -3.835491 | -4.205922 | 0.902015  |

|   |           |           |           |
|---|-----------|-----------|-----------|
| H | -6.362823 | -4.931702 | -1.440673 |
| H | -7.542025 | -3.282558 | -2.887276 |
| H | -6.546628 | -1.039213 | -3.280060 |
| H | -3.180759 | -0.128129 | -2.726676 |
| H | -4.807293 | 0.507961  | -3.071697 |
| H | -4.144791 | 0.571706  | -1.419230 |
| H | -1.457899 | 1.035216  | 0.941243  |
| C | 6.694209  | 5.396730  | -0.569546 |
| C | 5.631507  | 4.360556  | -0.209425 |
| N | 4.621045  | 4.853629  | 0.744223  |
| C | 5.151145  | 4.983144  | 2.119143  |
| C | 4.373926  | 5.999272  | 2.953243  |
| C | 3.419854  | 4.015473  | 0.703443  |
| C | 2.369450  | 4.449366  | -0.325921 |
| O | 1.476755  | 3.684558  | -0.687602 |
| N | 2.501341  | 5.746245  | -0.725479 |
| C | 1.646621  | 6.449112  | -1.624511 |
| C | 2.205353  | 6.970840  | -2.811559 |
| C | 3.664560  | 6.761480  | -3.135642 |
| C | 1.377883  | 7.686063  | -3.685463 |
| C | 0.025989  | 7.875356  | -3.395370 |
| C | -0.507688 | 7.362415  | -2.213815 |
| C | 0.287241  | 6.650532  | -1.302582 |
| C | -0.305010 | 6.149919  | -0.010045 |
| H | 7.379184  | 4.985224  | -1.328488 |
| H | 6.233727  | 6.309669  | -0.980434 |
| H | 7.307838  | 5.689733  | 0.296515  |
| H | 5.096935  | 4.070503  | -1.128782 |
| H | 6.114686  | 3.434139  | 0.169683  |
| H | 5.164179  | 3.998782  | 2.629473  |
| H | 6.196120  | 5.317728  | 2.044720  |
| H | 3.314596  | 5.717206  | 3.069395  |
| H | 4.803799  | 6.069905  | 3.965464  |
| H | 4.408428  | 6.998711  | 2.490109  |
| H | 3.639447  | 2.946939  | 0.522327  |
| H | 2.911994  | 4.058962  | 1.678922  |
| H | 3.367224  | 6.174711  | -0.391462 |
| H | 3.901212  | 7.141672  | -4.139772 |
| H | 4.325176  | 7.285418  | -2.422430 |
| H | 3.937908  | 5.694408  | -3.098171 |
| H | 1.801505  | 8.090855  | -4.607957 |
| H | -0.610312 | 8.431284  | -4.087594 |
| H | -1.561690 | 7.526333  | -1.976783 |
| H | -1.266056 | 6.643162  | 0.195165  |
| H | -0.469079 | 5.061220  | -0.041640 |
| H | 0.372173  | 6.345179  | 0.836958  |

|   |           |           |           |
|---|-----------|-----------|-----------|
| C | 4.191295  | -3.532402 | -3.251266 |
| C | 4.096584  | -4.526760 | -2.096497 |
| N | 2.713995  | -4.981103 | -1.844557 |
| C | 2.662982  | -6.268094 | -1.122570 |
| C | 3.046182  | -7.470456 | -1.982677 |
| C | 1.908351  | -3.966931 | -1.153805 |
| C | 0.468583  | -3.879207 | -1.663294 |
| O | -0.399824 | -3.289257 | -1.005723 |
| N | 0.275912  | -4.447327 | -2.874621 |
| C | -0.936833 | -4.454573 | -3.632514 |
| C | -1.573835 | -5.690617 | -3.867996 |
| C | -1.007021 | -6.974137 | -3.311157 |
| C | -2.746662 | -5.699789 | -4.633488 |
| C | -3.274560 | -4.514030 | -5.145674 |
| C | -2.624321 | -3.303111 | -4.911014 |
| C | -1.441454 | -3.247417 | -4.159650 |
| C | -0.729118 | -1.935419 | -3.950446 |
| H | 5.239483  | -3.229733 | -3.405553 |
| H | 3.817082  | -3.978513 | -4.187100 |
| H | 3.614282  | -2.613376 | -3.059414 |
| H | 4.694839  | -5.413952 | -2.350584 |
| H | 4.543028  | -4.101157 | -1.175688 |
| H | 3.295507  | -6.232258 | -0.210660 |
| H | 1.626999  | -6.402650 | -0.771606 |
| H | 2.924113  | -8.399876 | -1.403529 |
| H | 2.406702  | -7.537284 | -2.877905 |
| H | 4.094041  | -7.432745 | -2.319009 |
| H | 1.874631  | -4.104545 | -0.058443 |
| H | 2.338225  | -2.966284 | -1.321857 |
| H | 1.104968  | -4.956133 | -3.196616 |
| H | -0.845555 | -6.908420 | -2.222958 |
| H | -1.683973 | -7.818117 | -3.506136 |
| H | -0.031187 | -7.223304 | -3.763673 |
| H | -3.253050 | -6.649944 | -4.820224 |
| H | -4.195165 | -4.534195 | -5.732783 |
| H | -3.032264 | -2.376792 | -5.321438 |
| H | -0.793043 | -1.605780 | -2.902156 |
| H | 0.342567  | -2.016895 | -4.191701 |
| H | -1.160287 | -1.142728 | -4.577334 |
| C | 3.747186  | 1.542683  | 5.701932  |
| C | 4.165033  | 0.704479  | 4.506778  |
| H | 5.033717  | 0.071428  | 4.782739  |
| O | 4.510791  | 1.573124  | 3.429688  |
| C | 3.057326  | -0.269231 | 4.062517  |
| O | 2.031369  | -0.449600 | 4.710247  |
| O | 3.251094  | -0.909941 | 2.918912  |

|   |            |           |           |
|---|------------|-----------|-----------|
| H | 2.892564   | 2.185045  | 5.440526  |
| H | 3.446756   | 0.900369  | 6.541176  |
| H | 4.586477   | 2.181419  | 6.013664  |
| H | 5.030057   | 1.043985  | 2.785427  |
| H | 4.154374   | -0.705281 | 2.469281  |
| C | 8.085039   | -4.276500 | 2.160217  |
| C | 7.114248   | -3.150020 | 1.803599  |
| H | 7.017948   | -3.087332 | 0.701207  |
| O | 7.602852   | -1.956177 | 2.357758  |
| C | 5.720950   | -3.495646 | 2.336272  |
| O | 5.374122   | -3.267184 | 3.493551  |
| O | 4.939663   | -4.073668 | 1.434907  |
| H | 8.147518   | -4.375977 | 3.254766  |
| H | 7.764300   | -5.235668 | 1.724635  |
| H | 9.084713   | -4.025201 | 1.775251  |
| H | 6.905130   | -1.273762 | 2.218815  |
| H | 4.017677   | -4.216711 | 1.821213  |
| C | -6.579626  | 4.391840  | -0.853521 |
| C | -7.901608  | 3.727193  | -0.465383 |
| N | -7.938209  | 2.293104  | -0.779771 |
| C | -9.295011  | 1.729638  | -0.835149 |
| C | -9.391756  | 0.508204  | -1.751425 |
| C | -6.988702  | 1.488398  | -0.035420 |
| C | -7.188093  | 1.408864  | 1.494900  |
| O | -8.153064  | 1.894202  | 2.072323  |
| N | -6.173139  | 0.739724  | 2.141282  |
| C | -6.159296  | 0.417536  | 3.532394  |
| C | -6.140212  | 1.436284  | 4.509618  |
| C | -6.162292  | 2.895866  | 4.136852  |
| C | -6.091634  | 1.057733  | 5.860300  |
| C | -6.050131  | -0.283664 | 6.237820  |
| C | -6.064560  | -1.278027 | 5.258670  |
| C | -6.128124  | -0.946983 | 3.899430  |
| C | -6.190679  | -2.029672 | 2.848604  |
| H | -6.330557  | 4.178522  | -1.906112 |
| H | -6.656740  | 5.484162  | -0.727119 |
| H | -5.735806  | 4.054660  | -0.229896 |
| H | -8.127018  | 3.928021  | 0.600980  |
| H | -8.709048  | 4.195666  | -1.051936 |
| H | -9.684935  | 1.485975  | 0.171598  |
| H | -9.948707  | 2.519313  | -1.239962 |
| H | -10.439682 | 0.173991  | -1.829006 |
| H | -9.025001  | 0.750760  | -2.762409 |
| H | -8.806445  | -0.346968 | -1.376097 |
| H | -7.001632  | 0.456473  | -0.424008 |
| H | -5.965749  | 1.851781  | -0.224639 |

|   |           |           |           |
|---|-----------|-----------|-----------|
| H | -5.469426 | 0.278436  | 1.562657  |
| H | -7.167516 | 3.191148  | 3.798998  |
| H | -5.870629 | 3.524016  | 4.991573  |
| H | -5.476848 | 3.104038  | 3.299601  |
| H | -6.077588 | 1.838760  | 6.624947  |
| H | -6.006575 | -0.555045 | 7.295213  |
| H | -6.041680 | -2.331761 | 5.548480  |
| H | -5.332110 | -1.990164 | 2.158503  |
| H | -6.207934 | -3.025511 | 3.315183  |
| H | -7.095369 | -1.928344 | 2.226279  |
| C | -2.415334 | 3.804106  | -2.600918 |
| C | -1.187843 | 2.905302  | -2.633907 |
| H | -0.271886 | 3.520194  | -2.534493 |
| O | -1.197446 | 2.173466  | -3.852803 |
| C | -1.145181 | 1.961592  | -1.422900 |
| O | -1.733879 | 2.187897  | -0.370488 |
| O | -0.423758 | 0.848343  | -1.539831 |
| H | -3.330360 | 3.204854  | -2.727416 |
| H | -2.482400 | 4.342811  | -1.646635 |
| H | -2.355064 | 4.529049  | -3.424988 |
| H | -0.283749 | 1.928144  | -4.076595 |
| H | 0.131780  | 0.834162  | -2.371023 |
| C | -0.313483 | -4.545076 | 3.021499  |
| C | 0.637510  | -3.685700 | 3.835296  |
| H | 0.561596  | -3.938763 | 4.910089  |
| O | 0.299744  | -2.318320 | 3.623705  |
| C | 2.104072  | -3.892455 | 3.436743  |
| O | 2.453807  | -4.284747 | 2.319841  |
| O | 2.937327  | -3.567151 | 4.399467  |
| H | -0.225339 | -4.307115 | 1.950770  |
| H | -0.094892 | -5.615162 | 3.160444  |
| H | -1.347117 | -4.354593 | 3.348016  |
| H | 0.931335  | -1.735021 | 4.114464  |
| H | 3.887569  | -3.517146 | 4.047851  |

Table S18. B3LYP/cc-pVDZ optimized geometry of Lid:Cou:La structure D.

225

|   |           |           |          |
|---|-----------|-----------|----------|
| C | -3.155245 | -6.086210 | 5.665498 |
| C | -2.822749 | -4.933786 | 4.757366 |
| C | -3.464054 | -3.723724 | 4.905255 |
| C | -3.182963 | -2.616734 | 4.047291 |
| O | -3.745956 | -1.507314 | 4.091348 |
| O | -2.231363 | -2.768060 | 3.085456 |
| C | -1.553416 | -3.956088 | 2.906544 |
| C | -0.613171 | -3.979703 | 1.891546 |

|   |           |           |           |
|---|-----------|-----------|-----------|
| C | 0.105867  | -5.170254 | 1.616024  |
| O | 0.993626  | -5.235708 | 0.654110  |
| C | -0.181632 | -6.317879 | 2.425371  |
| C | -1.113417 | -6.265596 | 3.441023  |
| C | -1.838544 | -5.077667 | 3.724657  |
| H | -3.920473 | -5.806266 | 6.401899  |
| H | -3.528820 | -6.947012 | 5.087302  |
| H | -2.259732 | -6.429435 | 6.208584  |
| H | -4.222921 | -3.562050 | 5.669985  |
| H | -0.446887 | -3.088049 | 1.290113  |
| H | 0.373704  | -7.234729 | 2.218517  |
| H | -1.297538 | -7.157277 | 4.042865  |
| C | -0.286959 | -0.185911 | -3.335192 |
| C | -0.445513 | 0.983644  | -2.375677 |
| N | -1.470793 | 0.705557  | -1.291356 |
| C | -1.010197 | -0.324681 | -0.277976 |
| C | 0.199909  | 0.091933  | 0.543583  |
| C | -1.949319 | 1.946982  | -0.601356 |
| C | -2.850497 | 2.814512  | -1.483746 |
| O | -2.747744 | 2.857191  | -2.704765 |
| N | -3.715679 | 3.574953  | -0.753400 |
| C | -4.518883 | 4.629386  | -1.287422 |
| C | -3.911358 | 5.740733  | -1.910018 |
| C | -2.416135 | 5.849476  | -2.058545 |
| C | -4.743788 | 6.764905  | -2.385854 |
| C | -6.128616 | 6.702755  | -2.239490 |
| C | -6.709535 | 5.600961  | -1.610204 |
| C | -5.919244 | 4.549186  | -1.131533 |
| C | -6.553318 | 3.348062  | -0.474686 |
| H | 0.507041  | 0.067716  | -4.051608 |
| H | 0.022183  | -1.117659 | -2.839656 |
| H | -1.219613 | -0.376569 | -3.889870 |
| H | 0.501963  | 1.241216  | -1.883411 |
| H | -0.826482 | 1.862348  | -2.905582 |
| H | -1.878803 | -0.501983 | 0.370598  |
| H | -0.827407 | -1.248192 | -0.840580 |
| H | 0.448368  | -0.733793 | 1.226470  |
| H | 1.091922  | 0.277099  | -0.070898 |
| H | 0.003787  | 0.983460  | 1.156697  |
| H | -2.479807 | 1.636344  | 0.307224  |
| H | -1.086015 | 2.554621  | -0.293156 |
| H | -3.859050 | 3.311533  | 0.224635  |
| H | -2.122277 | 6.888735  | -2.269278 |
| H | -1.889981 | 5.507907  | -1.153148 |
| H | -2.065430 | 5.212675  | -2.887134 |
| H | -4.285861 | 7.631543  | -2.869647 |

|   |           |           |           |
|---|-----------|-----------|-----------|
| H | -6.756576 | 7.515389  | -2.612506 |
| H | -7.795004 | 5.545269  | -1.494377 |
| H | -6.261777 | 3.254958  | 0.584333  |
| H | -7.650380 | 3.410435  | -0.522748 |
| H | -6.237503 | 2.415589  | -0.971384 |
| H | -2.310220 | 0.271691  | -1.729613 |
| C | -7.018707 | -0.261729 | 0.886625  |
| C | -6.676336 | -1.693859 | 1.285289  |
| N | -6.122286 | -2.500310 | 0.183983  |
| C | -6.128429 | -3.936347 | 0.520873  |
| C | -6.014172 | -4.853726 | -0.693768 |
| C | -4.804883 | -2.009987 | -0.251042 |
| C | -4.784545 | -1.330711 | -1.623381 |
| O | -3.822318 | -0.648698 | -1.993975 |
| N | -5.867180 | -1.601481 | -2.392311 |
| C | -6.079427 | -1.221741 | -3.751513 |
| C | -7.236112 | -0.475069 | -4.063751 |
| C | -8.200547 | -0.049770 | -2.983700 |
| C | -7.470376 | -0.127624 | -5.399115 |
| C | -6.577798 | -0.504740 | -6.402994 |
| C | -5.448192 | -1.253502 | -6.078455 |
| C | -5.179076 | -1.636941 | -4.756034 |
| C | -3.974256 | -2.488015 | -4.449729 |
| H | -7.761113 | -0.242692 | 0.074020  |
| H | -7.446366 | 0.274608  | 1.749497  |
| H | -6.134491 | 0.305252  | 0.557174  |
| H | -5.980607 | -1.682041 | 2.153686  |
| H | -7.595640 | -2.196908 | 1.625925  |
| H | -5.325594 | -4.178438 | 1.251732  |
| H | -7.083693 | -4.137770 | 1.032155  |
| H | -6.832542 | -4.663496 | -1.407871 |
| H | -5.052068 | -4.738580 | -1.212498 |
| H | -6.086793 | -5.905077 | -0.369085 |
| H | -4.369043 | -1.301408 | 0.473390  |
| H | -4.086745 | -2.841824 | -0.350989 |
| H | -6.613985 | -2.054052 | -1.860386 |
| H | -9.011265 | 0.562234  | -3.404058 |
| H | -8.668173 | -0.913540 | -2.478569 |
| H | -7.695279 | 0.542759  | -2.204095 |
| H | -8.360605 | 0.455154  | -5.648002 |
| H | -6.767999 | -0.220799 | -7.440482 |
| H | -4.757376 | -1.564903 | -6.865921 |
| H | -4.211498 | -3.288742 | -3.732393 |
| H | -3.581409 | -2.947335 | -5.368636 |
| H | -3.175482 | -1.889577 | -3.985340 |
| C | 4.914706  | 5.575406  | 0.437155  |

|   |           |          |           |
|---|-----------|----------|-----------|
| C | 3.483457  | 5.700463 | -0.079147 |
| N | 2.575816  | 6.425845 | 0.832308  |
| C | 2.870600  | 7.865426 | 0.904948  |
| C | 2.319984  | 8.529933 | 2.165502  |
| C | 1.181529  | 6.160323 | 0.476141  |
| C | 0.587376  | 4.905543 | 1.126325  |
| O | -0.424476 | 4.376392 | 0.669428  |
| N | 1.238546  | 4.505875 | 2.253199  |
| C | 0.920032  | 3.370283 | 3.055370  |
| C | -0.339887 | 3.269735 | 3.682731  |
| C | -1.373996 | 4.360811 | 3.571943  |
| C | -0.609312 | 2.124261 | 4.449514  |
| C | 0.354977  | 1.132047 | 4.621064  |
| C | 1.610919  | 1.268208 | 4.026699  |
| C | 1.910859  | 2.378292 | 3.228509  |
| C | 3.252589  | 2.498818 | 2.549302  |
| H | 4.925161  | 5.160496 | 1.458038  |
| H | 5.474436  | 4.883996 | -0.209861 |
| H | 5.451321  | 6.537568 | 0.455023  |
| H | 3.483352  | 6.177849 | -1.085190 |
| H | 3.071487  | 4.689371 | -0.220101 |
| H | 3.963897  | 7.981409 | 0.899467  |
| H | 2.498039  | 8.393821 | -0.001072 |
| H | 1.221523  | 8.466774 | 2.228172  |
| H | 2.736202  | 8.055766 | 3.068776  |
| H | 2.586624  | 9.599240 | 2.180481  |
| H | 0.544745  | 6.995441 | 0.808760  |
| H | 1.023729  | 6.062672 | -0.615094 |
| H | 2.128282  | 4.989241 | 2.384320  |
| H | -0.904260 | 5.356355 | 3.614054  |
| H | -1.915230 | 4.303125 | 2.615359  |
| H | -2.101568 | 4.286870 | 4.393161  |
| H | -1.592421 | 2.011794 | 4.913119  |
| H | 0.128756  | 0.250601 | 5.225894  |
| H | 2.369710  | 0.493806 | 4.163849  |
| H | 3.879755  | 1.624558 | 2.777336  |
| H | 3.147633  | 2.566355 | 1.454485  |
| H | 3.807583  | 3.394287 | 2.881110  |
| C | -5.388855 | 2.857404 | 4.578719  |
| C | -4.839305 | 1.507805 | 4.145386  |
| H | -5.676365 | 0.786256 | 4.039150  |
| O | -3.923867 | 1.053935 | 5.132487  |
| C | -4.173332 | 1.583289 | 2.754286  |
| O | -4.274291 | 2.555808 | 2.024731  |
| O | -3.485108 | 0.512444 | 2.349867  |
| H | -4.574511 | 3.591736 | 4.666253  |



|   |           |           |           |
|---|-----------|-----------|-----------|
| H | -6.116150 | 3.240774  | 3.850027  |
| H | -5.875287 | 2.750973  | 5.559129  |
| H | -3.852075 | 0.084607  | 5.058880  |
| H | -3.492664 | -0.232225 | 3.015838  |
| C | 4.143485  | -3.479337 | -2.704308 |
| C | 3.047304  | -3.822819 | -1.708287 |
| H | 3.286183  | -4.760864 | -1.173590 |
| O | 1.796293  | -3.975198 | -2.397456 |
| C | 2.864849  | -2.730163 | -0.632676 |
| O | 3.424797  | -1.636742 | -0.725160 |
| O | 2.083652  | -3.004715 | 0.380095  |
| H | 5.116503  | -3.373124 | -2.199410 |
| H | 4.221946  | -4.279075 | -3.456156 |
| H | 3.911749  | -2.532206 | -3.212638 |
| H | 1.518281  | -4.923579 | -2.369506 |
| H | 1.651896  | -3.972093 | 0.410749  |
| C | 4.611480  | -1.777221 | 2.776327  |
| C | 5.900468  | -2.242221 | 2.088511  |
| N | 6.848879  | -1.190549 | 1.671998  |
| C | 7.451664  | -0.417081 | 2.770957  |
| C | 8.276571  | -1.259096 | 3.740814  |
| C | 6.321311  | -0.314095 | 0.626747  |
| C | 7.341439  | 0.009866  | -0.469735 |
| O | 7.115864  | 0.873350  | -1.333593 |
| N | 8.458612  | -0.748240 | -0.429584 |
| C | 9.517876  | -0.793284 | -1.385654 |
| C | 9.786431  | -2.034407 | -2.003057 |
| C | 8.956879  | -3.254395 | -1.681563 |
| C | 10.837051 | -2.109054 | -2.924673 |
| C | 11.599807 | -0.981242 | -3.231000 |
| C | 11.326471 | 0.232317  | -2.602179 |
| C | 10.291005 | 0.352832  | -1.663133 |
| C | 10.050307 | 1.667793  | -0.967986 |
| H | 3.981850  | -2.649464 | 3.013754  |
| H | 4.813535  | -1.243206 | 3.719343  |
| H | 4.016537  | -1.124799 | 2.118704  |
| H | 6.444720  | -2.941852 | 2.742276  |
| H | 5.642133  | -2.812436 | 1.181438  |
| H | 8.111527  | 0.332813  | 2.303888  |
| H | 6.684387  | 0.158201  | 3.331692  |
| H | 9.036639  | -1.851185 | 3.204944  |
| H | 8.796180  | -0.601842 | 4.455851  |
| H | 7.655663  | -1.953481 | 4.327900  |
| H | 5.471475  | -0.799988 | 0.119379  |
| H | 5.931447  | 0.648334  | 1.007308  |
| H | 8.395288  | -1.462037 | 0.303275  |

|   |           |           |           |
|---|-----------|-----------|-----------|
| H | 7.880429  | -3.060880 | -1.820389 |
| H | 9.237569  | -4.099016 | -2.326632 |
| H | 9.090622  | -3.583131 | -0.635367 |
| H | 11.049975 | -3.063551 | -3.412089 |
| H | 12.413776 | -1.051101 | -3.955974 |
| H | 11.933831 | 1.111746  | -2.829660 |
| H | 9.912023  | 1.526180  | 0.116447  |
| H | 10.899442 | 2.349536  | -1.119563 |
| H | 9.134901  | 2.149667  | -1.343859 |
| C | 4.076905  | 1.894114  | -3.985385 |
| C | 4.032737  | 1.002221  | -2.744137 |
| H | 5.005705  | 0.488023  | -2.637090 |
| O | 2.984830  | 0.072239  | -2.908775 |
| C | 3.821807  | 1.889626  | -1.501443 |
| O | 2.726470  | 2.238237  | -1.104843 |
| O | 4.936153  | 2.320445  | -0.891458 |
| H | 3.124053  | 2.435916  | -4.088754 |
| H | 4.897531  | 2.624888  | -3.918487 |
| H | 4.227475  | 1.270186  | -4.879062 |
| H | 3.042379  | -0.550066 | -2.155796 |
| H | 5.748657  | 1.807580  | -1.177249 |
| C | -1.776060 | -7.114185 | -1.441749 |
| C | -0.959472 | -5.977369 | -2.053075 |
| H | -1.040038 | -6.030219 | -3.154470 |
| O | 0.428241  | -6.117633 | -1.767072 |
| C | -1.554233 | -4.600224 | -1.674606 |
| O | -2.749298 | -4.459090 | -1.504078 |
| O | -0.731537 | -3.552776 | -1.574690 |
| H | -2.830133 | -7.039781 | -1.741164 |
| H | -1.365473 | -8.076769 | -1.780025 |
| H | -1.729196 | -7.078131 | -0.341381 |
| H | 0.583630  | -5.955979 | -0.791788 |
| H | 0.220647  | -3.756475 | -1.776715 |

Table S19. B3LYP/cc-pVDZ optimized geometry of Lid:Cou:La structure E.

225

|   |          |           |           |
|---|----------|-----------|-----------|
| C | 8.476097 | -1.985206 | 3.637168  |
| C | 7.297842 | -1.729347 | 2.736398  |
| C | 7.456505 | -1.742503 | 1.365747  |
| C | 6.363757 | -1.491732 | 0.486565  |
| O | 6.433195 | -1.467699 | -0.757879 |
| O | 5.135908 | -1.247737 | 1.025345  |
| C | 4.922915 | -1.240129 | 2.389974  |
| C | 3.626594 | -0.995343 | 2.812431  |
| C | 3.330303 | -0.947464 | 4.205298  |

|   |           |           |           |
|---|-----------|-----------|-----------|
| O | 2.140174  | -0.720749 | 4.664481  |
| C | 4.420109  | -1.172904 | 5.117620  |
| C | 5.695658  | -1.425468 | 4.670772  |
| C | 6.003156  | -1.469732 | 3.282661  |
| H | 8.295776  | -2.859967 | 4.282876  |
| H | 9.389984  | -2.167791 | 3.055902  |
| H | 8.655399  | -1.126435 | 4.304304  |
| H | 8.421398  | -1.934594 | 0.897999  |
| H | 2.839291  | -0.839617 | 2.073205  |
| H | 4.193292  | -1.137625 | 6.184876  |
| H | 6.493188  | -1.593856 | 5.396686  |
| C | -1.795682 | -1.311515 | -3.160384 |
| C | -1.554875 | -1.552378 | -1.676191 |
| N | -1.938083 | -0.376734 | -0.809913 |
| C | -1.862658 | -0.704117 | 0.668282  |
| C | -2.878724 | -1.734630 | 1.135914  |
| C | -1.111202 | 0.837055  | -1.082303 |
| C | -1.921075 | 2.088837  | -0.736571 |
| O | -3.150629 | 2.038825  | -0.722364 |
| N | -1.171834 | 3.195756  | -0.530343 |
| C | -1.697610 | 4.528067  | -0.480434 |
| C | -1.340482 | 5.409305  | -1.523436 |
| C | -0.457424 | 4.949764  | -2.658539 |
| C | -1.827320 | 6.721911  | -1.478811 |
| C | -2.647893 | 7.145361  | -0.431928 |
| C | -2.982570 | 6.259679  | 0.591454  |
| C | -2.511565 | 4.938071  | 0.592805  |
| C | -2.867232 | 4.001114  | 1.717206  |
| H | -1.150183 | -0.531664 | -3.588007 |
| H | -1.588025 | -2.251945 | -3.695141 |
| H | -2.846156 | -1.042320 | -3.343666 |
| H | -2.181578 | -2.383408 | -1.332580 |
| H | -0.508216 | -1.792915 | -1.441041 |
| H | -0.831388 | -1.033625 | 0.854242  |
| H | -2.020885 | 0.239226  | 1.204743  |
| H | -3.911569 | -1.424883 | 0.922675  |
| H | -2.716589 | -2.729530 | 0.694571  |
| H | -2.759999 | -1.834264 | 2.225801  |
| H | -0.165155 | 0.765883  | -0.530943 |
| H | -0.870553 | 0.890980  | -2.152117 |
| H | -0.150023 | 3.083847  | -0.555793 |
| H | -0.820008 | 4.019125  | -3.121782 |
| H | -0.390978 | 5.721619  | -3.439081 |
| H | 0.568680  | 4.732029  | -2.317222 |
| H | -1.563995 | 7.414010  | -2.282797 |
| H | -3.023952 | 8.171181  | -0.412135 |

|   |           |           |           |
|---|-----------|-----------|-----------|
| H | -3.615299 | 6.594755  | 1.417254  |
| H | -1.998299 | 3.405242  | 2.036119  |
| H | -3.237948 | 4.563533  | 2.587493  |
| H | -3.645581 | 3.290897  | 1.398084  |
| H | -2.934424 | -0.142884 | -1.030297 |
| C | -8.686311 | 1.294563  | -4.268302 |
| C | -7.333390 | 1.461947  | -3.579479 |
| N | -7.400649 | 1.336279  | -2.113069 |
| C | -7.968031 | 2.537491  | -1.470008 |
| C | -8.614769 | 2.238534  | -0.119709 |
| C | -6.089610 | 0.986527  | -1.560136 |
| C | -5.791172 | -0.510900 | -1.606452 |
| O | -4.639194 | -0.954117 | -1.509313 |
| N | -6.900172 | -1.287734 | -1.712790 |
| C | -6.980136 | -2.705191 | -1.564238 |
| C | -6.355954 | -3.560265 | -2.495473 |
| C | -5.595500 | -3.020340 | -3.678833 |
| C | -6.482474 | -4.944906 | -2.310017 |
| C | -7.220539 | -5.467605 | -1.248893 |
| C | -7.853797 | -4.604620 | -0.353463 |
| C | -7.744727 | -3.215066 | -0.491558 |
| C | -8.425578 | -2.286901 | 0.484887  |
| H | -9.122762 | 0.308664  | -4.040008 |
| H | -9.411944 | 2.063792  | -3.960087 |
| H | -8.568435 | 1.374721  | -5.361215 |
| H | -6.654105 | 0.676104  | -3.947531 |
| H | -6.870515 | 2.430584  | -3.870806 |
| H | -7.190722 | 3.323240  | -1.359704 |
| H | -8.730397 | 2.950865  | -2.147381 |
| H | -9.003507 | 3.167920  | 0.328209  |
| H | -9.456264 | 1.536440  | -0.241205 |
| H | -7.901900 | 1.796768  | 0.592249  |
| H | -5.246942 | 1.522649  | -2.032983 |
| H | -6.054540 | 1.246082  | -0.491134 |
| H | -7.756655 | -0.729006 | -1.691128 |
| H | -5.397840 | -3.814375 | -4.413638 |
| H | -6.159048 | -2.217074 | -4.180730 |
| H | -4.636385 | -2.583342 | -3.362867 |
| H | -6.003316 | -5.618469 | -3.025171 |
| H | -7.312432 | -6.549293 | -1.125535 |
| H | -8.440270 | -5.009830 | 0.474961  |
| H | -9.206905 | -1.679112 | -0.005898 |
| H | -8.917014 | -2.860338 | 1.284492  |
| H | -7.715034 | -1.582940 | 0.945445  |
| C | 2.886214  | -5.553415 | 4.099907  |
| C | 1.418166  | -5.178231 | 4.289310  |

|   |           |           |           |
|---|-----------|-----------|-----------|
| N | 0.715913  | -4.931795 | 3.015493  |
| C | -0.746181 | -5.062864 | 3.147494  |
| C | -1.229495 | -6.503464 | 3.300848  |
| C | 1.062377  | -3.624492 | 2.450196  |
| C | 1.057666  | -3.574326 | 0.919746  |
| O | 0.963967  | -2.503949 | 0.317915  |
| N | 1.224347  | -4.788935 | 0.325072  |
| C | 1.304882  | -5.043316 | -1.077624 |
| C | 0.338359  | -5.891773 | -1.660391 |
| C | -0.766220 | -6.496172 | -0.827592 |
| C | 0.425693  | -6.166281 | -3.030848 |
| C | 1.444519  | -5.611416 | -3.807000 |
| C | 2.398632  | -4.786389 | -3.212516 |
| C | 2.355607  | -4.490879 | -1.841280 |
| C | 3.428700  | -3.635575 | -1.221092 |
| H | 3.354564  | -5.754575 | 5.076881  |
| H | 2.981186  | -6.457086 | 3.476505  |
| H | 3.464977  | -4.746476 | 3.623234  |
| H | 0.907203  | -6.008930 | 4.797470  |
| H | 1.331945  | -4.296406 | 4.960217  |
| H | -1.120948 | -4.443176 | 3.992546  |
| H | -1.194862 | -4.636686 | 2.235442  |
| H | -0.875566 | -6.971376 | 4.232664  |
| H | -2.330820 | -6.529662 | 3.321196  |
| H | -0.886502 | -7.125865 | 2.458955  |
| H | 0.416257  | -2.804397 | 2.815401  |
| H | 2.087210  | -3.354108 | 2.747172  |
| H | 1.167228  | -5.565484 | 0.985966  |
| H | -0.376317 | -7.213270 | -0.083477 |
| H | -1.321799 | -5.726986 | -0.266909 |
| H | -1.481784 | -7.040176 | -1.460572 |
| H | -0.319402 | -6.820294 | -3.490824 |
| H | 1.501278  | -5.833338 | -4.875195 |
| H | 3.213099  | -4.371694 | -3.811180 |
| H | 3.036106  | -2.642384 | -0.953429 |
| H | 3.800293  | -4.086617 | -0.286434 |
| H | 4.274954  | -3.508972 | -1.909911 |
| C | 1.936195  | -0.758012 | -4.839072 |
| C | 1.865364  | 0.601246  | -5.528462 |
| H | 1.256766  | 0.509243  | -6.448268 |
| O | 3.133697  | 1.134101  | -5.899961 |
| C | 1.138297  | 1.649410  | -4.663373 |
| O | 0.055564  | 1.478464  | -4.142173 |
| O | 1.815454  | 2.801542  | -4.567773 |
| H | 2.505356  | -0.698065 | -3.899023 |
| H | 0.924131  | -1.120246 | -4.613191 |

|   |          |           |           |
|---|----------|-----------|-----------|
| H | 2.429972 | -1.486210 | -5.499469 |
| H | 3.859774 | 0.603279  | -5.489102 |
| H | 2.640417 | 2.615028  | -5.090141 |
| C | 7.222371 | -2.272755 | -5.256357 |
| C | 6.823156 | -1.788896 | -3.870316 |
| H | 7.645912 | -1.177873 | -3.443417 |
| O | 6.569052 | -2.917984 | -3.050194 |
| C | 5.602539 | -0.848007 | -3.933150 |
| O | 5.239940 | -0.330309 | -4.980335 |
| O | 4.951175 | -0.598893 | -2.799528 |
| H | 7.399813 | -1.426334 | -5.933158 |
| H | 8.134668 | -2.881622 | -5.178987 |
| H | 6.421802 | -2.895080 | -5.684480 |
| H | 6.700271 | -2.646963 | -2.121934 |
| H | 5.396127 | -0.999205 | -1.999295 |
| C | 5.143908 | 4.744443  | -3.452731 |
| C | 5.713347 | 3.485801  | -2.800459 |
| N | 5.085761 | 3.175825  | -1.503543 |
| C | 5.935364 | 2.319797  | -0.652885 |
| C | 7.102080 | 3.065947  | -0.009298 |
| C | 3.746556 | 2.601715  | -1.661799 |
| C | 2.739160 | 3.047171  | -0.602178 |
| O | 1.618348 | 2.526914  | -0.550631 |
| N | 3.178098 | 4.040694  | 0.205645  |
| C | 2.461524 | 4.665828  | 1.273824  |
| C | 2.210015 | 6.050892  | 1.187834  |
| C | 2.647277 | 6.844132  | -0.020032 |
| C | 1.543536 | 6.672566  | 2.251071  |
| C | 1.136028 | 5.939228  | 3.366694  |
| C | 1.399890 | 4.571259  | 3.438167  |
| C | 2.070821 | 3.909974  | 2.398193  |
| C | 2.382248 | 2.441851  | 2.517542  |
| H | 5.656867 | 4.944319  | -4.407468 |
| H | 4.067771 | 4.651420  | -3.671412 |
| H | 5.279851 | 5.619561  | -2.796979 |
| H | 5.630679 | 2.622471  | -3.495604 |
| H | 6.788386 | 3.638236  | -2.623064 |
| H | 5.294317 | 1.914609  | 0.145864  |
| H | 6.305117 | 1.442164  | -1.223094 |
| H | 7.800089 | 3.480694  | -0.753897 |
| H | 6.741901 | 3.898747  | 0.616430  |
| H | 7.678586 | 2.380197  | 0.632364  |
| H | 3.309954 | 2.906775  | -2.623461 |
| H | 3.749344 | 1.495988  | -1.673521 |
| H | 4.089216 | 4.402697  | -0.085910 |
| H | 3.747696 | 6.911797  | -0.093864 |

|   |           |           |           |
|---|-----------|-----------|-----------|
| H | 2.292247  | 6.384823  | -0.956684 |
| H | 2.257854  | 7.871154  | 0.024812  |
| H | 1.335098  | 7.743666  | 2.193537  |
| H | 0.615129  | 6.438649  | 4.186948  |
| H | 1.103568  | 3.991160  | 4.315585  |
| H | 2.108207  | 2.069895  | 3.511941  |
| H | 1.828021  | 1.857023  | 1.767938  |
| H | 3.454158  | 2.245305  | 2.349041  |
| C | -6.078832 | -0.226949 | 4.888295  |
| C | -5.062332 | 0.357313  | 3.908702  |
| H | -4.352328 | -0.424412 | 3.593124  |
| O | -4.371031 | 1.449462  | 4.507653  |
| C | -5.772002 | 0.848721  | 2.635822  |
| O | -6.319079 | 0.118600  | 1.833904  |
| O | -5.751375 | 2.178090  | 2.496420  |
| H | -5.559488 | -0.642452 | 5.764653  |
| H | -6.767071 | 0.559877  | 5.236552  |
| H | -6.665661 | -1.020906 | 4.403416  |
| H | -3.415375 | 1.353754  | 4.264950  |
| H | -5.205065 | 2.489129  | 3.261000  |
| C | -1.379115 | 1.830736  | 6.246984  |
| C | -0.405139 | 0.869457  | 5.582973  |
| H | -0.421091 | -0.099967 | 6.126585  |
| O | 0.891166  | 1.440008  | 5.641061  |
| C | -0.812479 | 0.522037  | 4.131173  |
| O | -1.916620 | 0.812583  | 3.662198  |
| O | 0.054698  | -0.133699 | 3.393838  |
| H | -2.401676 | 1.429483  | 6.264043  |
| H | -1.048464 | 2.017038  | 7.279076  |
| H | -1.394096 | 2.791279  | 5.708946  |
| H | 1.540688  | 0.718864  | 5.477984  |
| H | 0.954054  | -0.368862 | 3.877114  |

Table S20. B3LYP/cc-pVDZ optimized geometry of Lid:Cou:Le structure A.

241

|   |           |           |           |
|---|-----------|-----------|-----------|
| C | 0.013496  | -0.250209 | -8.583838 |
| C | 0.164537  | 0.005964  | -7.109875 |
| C | -0.513548 | 1.030604  | -6.504478 |
| C | -0.403625 | 1.289680  | -5.093919 |
| O | -1.014594 | 2.165355  | -4.480172 |
| O | 0.448314  | 0.502840  | -4.362718 |
| C | 1.147327  | -0.537192 | -4.929380 |
| C | 1.956971  | -1.271407 | -4.070757 |
| C | 2.672378  | -2.367223 | -4.580328 |
| O | 3.450884  | -3.132591 | -3.806616 |

|   |           |           |           |
|---|-----------|-----------|-----------|
| C | 2.562340  | -2.691810 | -5.956197 |
| C | 1.763313  | -1.935661 | -6.792123 |
| C | 1.024868  | -0.829229 | -6.306548 |
| H | -0.379941 | -1.263214 | -8.768545 |
| H | -0.668918 | 0.475316  | -9.046341 |
| H | 0.987608  | -0.186441 | -9.095629 |
| H | -1.182729 | 1.689356  | -7.057312 |
| H | 2.020026  | -1.008239 | -3.015786 |
| H | 3.121567  | -3.548704 | -6.333998 |
| H | 1.697403  | -2.200937 | -7.848132 |
| C | -2.999577 | 0.609020  | 3.056949  |
| C | -1.706491 | 1.382648  | 2.850057  |
| N | -1.159516 | 1.351094  | 1.441744  |
| C | 0.127429  | 2.160438  | 1.331084  |
| C | 0.034342  | 3.581527  | 1.860838  |
| C | -0.901557 | -0.034169 | 0.937771  |
| C | -2.151474 | -0.688254 | 0.350661  |
| O | -3.112585 | -0.003404 | -0.022371 |
| N | -2.048921 | -2.027417 | 0.231792  |
| C | -2.978363 | -2.841016 | -0.495021 |
| C | -3.746838 | -3.791382 | 0.205696  |
| C | -3.644716 | -3.945021 | 1.705404  |
| C | -4.624663 | -4.603303 | -0.530371 |
| C | -4.735741 | -4.472058 | -1.914790 |
| C | -3.944557 | -3.541956 | -2.592487 |
| C | -3.042895 | -2.722587 | -1.900056 |
| C | -2.127082 | -1.780626 | -2.642041 |
| H | -2.871170 | -0.474700 | 2.919576  |
| H | -3.320348 | 0.767981  | 4.098473  |
| H | -3.799567 | 0.955290  | 2.387865  |
| H | -1.872498 | 2.442183  | 3.077913  |
| H | -0.899836 | 0.999997  | 3.491142  |
| H | 0.896554  | 1.581127  | 1.855593  |
| H | 0.358740  | 2.168455  | 0.258677  |
| H | -0.073675 | 3.621027  | 2.954820  |
| H | 0.983786  | 4.074199  | 1.607670  |
| H | -0.787862 | 4.141240  | 1.390968  |
| H | -0.170208 | 0.042037  | 0.121253  |
| H | -0.422692 | -0.614695 | 1.737382  |
| H | -1.209047 | -2.507009 | 0.616755  |
| H | -2.612737 | -3.819624 | 2.062861  |
| H | -4.278374 | -3.208684 | 2.229947  |
| H | -3.995609 | -4.941522 | 2.012594  |
| H | -5.226535 | -5.346725 | -0.002254 |
| H | -5.429207 | -5.108032 | -2.470218 |
| H | -4.009820 | -3.459044 | -3.680251 |



|   |           |           |           |
|---|-----------|-----------|-----------|
| H | -2.250999 | -1.894348 | -3.728748 |
| H | -2.320975 | -0.727859 | -2.381177 |
| H | -1.073401 | -1.987571 | -2.392974 |
| H | -1.846498 | 1.811431  | 0.797861  |
| C | -7.859363 | -3.932359 | 1.843832  |
| C | -8.097270 | -2.531677 | 2.407961  |
| N | -6.845252 | -1.789286 | 2.641413  |
| C | -6.924765 | -0.831832 | 3.752396  |
| C | -6.829524 | -1.507741 | 5.120738  |
| C | -6.249124 | -1.230177 | 1.440503  |
| C | -6.949825 | -0.007703 | 0.818137  |
| O | -8.130335 | 0.253419  | 1.011890  |
| N | -6.126822 | 0.743547  | 0.004820  |
| C | -6.604164 | 1.742286  | -0.897038 |
| C | -6.429218 | 1.525597  | -2.282709 |
| C | -5.765435 | 0.266176  | -2.785474 |
| C | -6.909608 | 2.486692  | -3.181152 |
| C | -7.562366 | 3.632669  | -2.722129 |
| C | -7.715999 | 3.837488  | -1.351577 |
| C | -7.233860 | 2.909652  | -0.414365 |
| C | -7.383917 | 3.179974  | 1.060124  |
| H | -8.819207 | -4.459838 | 1.714800  |
| H | -7.368633 | -3.903069 | 0.857211  |
| H | -7.221936 | -4.525658 | 2.519454  |
| H | -8.782671 | -1.960896 | 1.755697  |
| H | -8.603730 | -2.630673 | 3.380359  |
| H | -6.076152 | -0.134933 | 3.646813  |
| H | -7.841359 | -0.210631 | 3.693797  |
| H | -7.666237 | -2.203250 | 5.296526  |
| H | -5.893001 | -2.081600 | 5.208948  |
| H | -6.857449 | -0.753586 | 5.924861  |
| H | -5.196461 | -0.971624 | 1.637882  |
| H | -6.215580 | -2.007845 | 0.659116  |
| H | -5.177695 | 0.393870  | -0.143830 |
| H | -4.732167 | 0.163004  | -2.415053 |
| H | -6.306252 | -0.633675 | -2.448556 |
| H | -5.734648 | 0.252623  | -3.884766 |
| H | -6.787874 | 2.318593  | -4.254442 |
| H | -7.948891 | 4.366261  | -3.433759 |
| H | -8.217078 | 4.738779  | -0.988697 |
| H | -7.616950 | 4.239476  | 1.243085  |
| H | -8.183825 | 2.555936  | 1.486605  |
| H | -6.460125 | 2.924697  | 1.603588  |
| C | 6.079300  | 1.693862  | 3.708506  |
| C | 5.071710  | 0.853215  | 2.926713  |
| N | 4.605161  | -0.341439 | 3.660161  |

|   |           |           |           |
|---|-----------|-----------|-----------|
| C | 5.615440  | -1.417591 | 3.680828  |
| C | 5.390199  | -2.427739 | 4.804841  |
| C | 3.307187  | -0.795257 | 3.145627  |
| C | 2.121900  | -0.259775 | 3.945083  |
| O | 0.976030  | -0.230219 | 3.481473  |
| N | 2.443635  | 0.118008  | 5.210575  |
| C | 1.545264  | 0.567834  | 6.216846  |
| C | 1.755813  | 1.845438  | 6.781331  |
| C | 2.892420  | 2.718782  | 6.308106  |
| C | 0.890169  | 2.285336  | 7.789949  |
| C | -0.164051 | 1.482101  | 8.227840  |
| C | -0.350394 | 0.218544  | 7.668328  |
| C | 0.499169  | -0.269907 | 6.663672  |
| C | 0.299543  | -1.658331 | 6.112070  |
| H | 5.657209  | 2.024789  | 4.671623  |
| H | 7.013422  | 1.149158  | 3.921712  |
| H | 6.348811  | 2.590957  | 3.127600  |
| H | 4.194537  | 1.476041  | 2.694927  |
| H | 5.495518  | 0.560689  | 1.943676  |
| H | 5.653828  | -1.928016 | 2.698378  |
| H | 6.596152  | -0.940181 | 3.832646  |
| H | 4.425367  | -2.948955 | 4.707835  |
| H | 6.182502  | -3.194853 | 4.787021  |
| H | 5.416881  | -1.933075 | 5.790177  |
| H | 3.153447  | -0.551523 | 2.081408  |
| H | 3.221991  | -1.890355 | 3.222175  |
| H | 3.458414  | 0.164929  | 5.344232  |
| H | 3.875513  | 2.297241  | 6.583550  |
| H | 2.891602  | 2.828939  | 5.211803  |
| H | 2.829769  | 3.721050  | 6.755911  |
| H | 1.044841  | 3.273935  | 8.229668  |
| H | -0.834492 | 1.838085  | 9.013607  |
| H | -1.162771 | -0.419754 | 8.025503  |
| H | 1.256062  | -2.183867 | 5.968908  |
| H | -0.332446 | -2.255981 | 6.785591  |
| H | -0.173312 | -1.626063 | 5.118016  |
| C | 7.052647  | 3.800727  | -2.433792 |
| C | 6.028667  | 2.827467  | -3.013136 |
| N | 4.667383  | 3.044212  | -2.484096 |
| C | 3.626705  | 2.470000  | -3.353563 |
| C | 3.410285  | 3.243386  | -4.653334 |
| C | 4.517821  | 2.569751  | -1.102630 |
| C | 3.663705  | 3.483871  | -0.217307 |
| O | 3.229515  | 3.104237  | 0.870876  |
| N | 3.480478  | 4.733017  | -0.729755 |
| C | 2.704868  | 5.770378  | -0.129299 |

|   |           |           |           |
|---|-----------|-----------|-----------|
| C | 1.520263  | 6.187980  | -0.771660 |
| C | 1.067236  | 5.551441  | -2.063634 |
| C | 0.757090  | 7.203736  | -0.179270 |
| C | 1.165522  | 7.791476  | 1.019039  |
| C | 2.345534  | 7.374414  | 1.635770  |
| C | 3.137116  | 6.361137  | 1.076611  |
| C | 4.414689  | 5.927384  | 1.748583  |
| H | 6.762250  | 4.845353  | -2.632513 |
| H | 7.170132  | 3.676751  | -1.345811 |
| H | 8.041328  | 3.622993  | -2.887351 |
| H | 5.986229  | 2.972674  | -4.102750 |
| H | 6.357998  | 1.785435  | -2.832640 |
| H | 3.846082  | 1.402841  | -3.579662 |
| H | 2.683007  | 2.473897  | -2.784947 |
| H | 3.160356  | 4.296854  | -4.448744 |
| H | 4.295312  | 3.226775  | -5.308323 |
| H | 2.577076  | 2.798229  | -5.220329 |
| H | 4.086618  | 1.553959  | -1.036871 |
| H | 5.502945  | 2.492498  | -0.619419 |
| H | 3.820779  | 4.820284  | -1.689474 |
| H | 0.059409  | 5.896893  | -2.328528 |
| H | 1.745782  | 5.797225  | -2.900088 |
| H | 1.041475  | 4.452082  | -1.986449 |
| H | -0.179515 | 7.503131  | -0.653781 |
| H | 0.560756  | 8.579579  | 1.474338  |
| H | 2.668733  | 7.842593  | 2.569210  |
| H | 5.244417  | 5.867805  | 1.025712  |
| H | 4.698464  | 6.630153  | 2.545454  |
| H | 4.302602  | 4.922400  | 2.186326  |
| C | 8.467401  | -0.687077 | 0.741861  |
| C | 7.539153  | -0.643332 | -0.451610 |
| O | 7.060466  | 0.403326  | -0.853312 |
| C | 7.269582  | -1.970462 | -1.149405 |
| C | 5.930330  | -2.023066 | -1.874335 |
| C | 4.741020  | -2.073110 | -0.910215 |
| O | 4.902093  | -1.910105 | 0.300142  |
| O | 3.578815  | -2.293452 | -1.469689 |
| H | 8.748226  | 0.329661  | 1.046436  |
| H | 7.942381  | -1.188620 | 1.572074  |
| H | 9.367875  | -1.283931 | 0.520365  |
| H | 8.096923  | -2.104259 | -1.872944 |
| H | 7.357198  | -2.790707 | -0.420428 |
| H | 5.808364  | -1.128798 | -2.507455 |
| H | 5.880546  | -2.890636 | -2.550910 |
| H | 3.501289  | -2.770115 | -2.806751 |
| C | -4.314089 | 6.750468  | -0.462395 |

|   |           |           |           |
|---|-----------|-----------|-----------|
| C | -3.411343 | 5.984314  | -1.403995 |
| O | -2.274187 | 6.350130  | -1.645686 |
| C | -4.007992 | 4.739785  | -2.044793 |
| C | -2.965687 | 3.772580  | -2.587102 |
| C | -2.225571 | 3.040658  | -1.483255 |
| O | -2.537774 | 3.132226  | -0.302692 |
| O | -1.204672 | 2.263605  | -1.841790 |
| H | -4.396532 | 6.179143  | 0.478628  |
| H | -3.893799 | 7.741665  | -0.247830 |
| H | -5.333564 | 6.840618  | -0.870675 |
| H | -4.679457 | 4.239881  | -1.331338 |
| H | -4.656913 | 5.090887  | -2.867570 |
| H | -3.436494 | 3.010012  | -3.229007 |
| H | -2.228142 | 4.291139  | -3.217786 |
| H | -1.077572 | 2.241854  | -2.836906 |
| C | -1.329686 | -6.800233 | 0.030400  |
| C | -0.197371 | -7.291199 | -0.841710 |
| O | 0.844827  | -7.707999 | -0.368244 |
| C | -0.422406 | -7.239611 | -2.349624 |
| C | 0.873816  | -7.199009 | -3.149427 |
| C | 1.560377  | -5.851974 | -3.038277 |
| O | 1.230608  | -4.982620 | -2.251431 |
| O | 2.576514  | -5.728154 | -3.900430 |
| H | -1.195945 | -5.711853 | 0.161306  |
| H | -2.316176 | -6.959333 | -0.430509 |
| H | -1.280709 | -7.276246 | 1.019558  |
| H | -0.999776 | -8.147718 | -2.606284 |
| H | -1.070565 | -6.382308 | -2.590167 |
| H | 1.576840  | -7.956230 | -2.764333 |
| H | 0.710536  | -7.424465 | -4.214499 |
| H | 2.961838  | -4.818483 | -3.794641 |
| C | 0.941171  | -5.867250 | 4.130741  |
| C | 1.800319  | -4.936081 | 3.303408  |
| O | 2.234647  | -3.892825 | 3.763630  |
| C | 2.112924  | -5.392447 | 1.887282  |
| C | 2.394585  | -4.265217 | 0.900963  |
| C | 1.203595  | -3.359363 | 0.661167  |
| O | 0.105597  | -3.551886 | 1.190251  |
| O | 1.381629  | -2.328142 | -0.142386 |
| H | 1.267195  | -6.914209 | 4.018317  |
| H | 0.955757  | -5.569963 | 5.187474  |
| H | -0.092561 | -5.809899 | 3.748146  |
| H | 3.015464  | -6.028016 | 1.971272  |
| H | 1.324837  | -6.063979 | 1.518251  |
| H | 3.237198  | -3.633350 | 1.222867  |
| H | 2.675767  | -4.679877 | -0.079655 |

H 2.306130 -2.328924 -0.590113

Table S21. B3LYP/cc-pVDZ optimized geometry of Lid:Cou:Le structure B.

241

|   |           |           |           |
|---|-----------|-----------|-----------|
| C | 1.580265  | -7.667292 | 3.624445  |
| C | 1.719451  | -6.187421 | 3.391125  |
| C | 1.805754  | -5.319833 | 4.451180  |
| C | 1.943486  | -3.901044 | 4.266642  |
| O | 2.017910  | -3.061820 | 5.166955  |
| O | 1.999339  | -3.429770 | 2.980160  |
| C | 1.911367  | -4.263622 | 1.888597  |
| C | 1.962677  | -3.652607 | 0.645643  |
| C | 1.854194  | -4.424094 | -0.536574 |
| O | 1.870432  | -3.861001 | -1.727377 |
| C | 1.712282  | -5.838966 | -0.387919 |
| C | 1.672876  | -6.428801 | 0.861700  |
| C | 1.764321  | -5.661177 | 2.051583  |
| H | 1.561468  | -7.901617 | 4.697348  |
| H | 0.653798  | -8.053330 | 3.168544  |
| H | 2.417054  | -8.217516 | 3.163836  |
| H | 1.775156  | -5.664388 | 5.484481  |
| H | 2.095891  | -2.573202 | 0.588599  |
| H | 1.641970  | -6.439455 | -1.296825 |
| H | 1.567113  | -7.512743 | 0.935901  |
| C | -1.157189 | -1.565209 | 2.284141  |
| C | -0.840021 | -0.098479 | 2.525983  |
| N | -0.691422 | 0.735258  | 1.273701  |
| C | 0.498206  | 0.380107  | 0.400612  |
| C | 1.831290  | 0.295433  | 1.123581  |
| C | -1.921934 | 0.748502  | 0.422059  |
| C | -3.081519 | 1.416428  | 1.152562  |
| O | -2.906440 | 2.466903  | 1.768557  |
| N | -4.276055 | 0.781570  | 1.018037  |
| C | -5.529285 | 1.314602  | 1.462039  |
| C | -5.782669 | 1.500174  | 2.836754  |
| C | -4.764834 | 1.142596  | 3.889348  |
| C | -7.034569 | 2.013216  | 3.209396  |
| C | -8.006124 | 2.315723  | 2.255900  |
| C | -7.742150 | 2.103406  | 0.901766  |
| C | -6.503059 | 1.603299  | 0.482540  |
| C | -6.213074 | 1.379044  | -0.981547 |
| H | -0.378499 | -2.073933 | 1.696823  |
| H | -1.209127 | -2.055500 | 3.268304  |
| H | -2.124977 | -1.712094 | 1.781856  |
| H | -1.618390 | 0.388686  | 3.125570  |

|   |           |           |           |
|---|-----------|-----------|-----------|
| H | 0.093989  | 0.026499  | 3.082299  |
| H | 0.248033  | -0.558982 | -0.106267 |
| H | 0.514237  | 1.173514  | -0.358407 |
| H | 2.599066  | 0.064709  | 0.368472  |
| H | 2.097498  | 1.241612  | 1.610496  |
| H | 1.866019  | -0.498580 | 1.882740  |
| H | -1.683961 | 1.365649  | -0.455266 |
| H | -2.144854 | -0.270805 | 0.087622  |
| H | -4.296034 | -0.078551 | 0.461410  |
| H | -5.229997 | 1.103160  | 4.885084  |
| H | -4.304303 | 0.162722  | 3.687165  |
| H | -3.943680 | 1.875806  | 3.913422  |
| H | -7.247048 | 2.164789  | 4.270669  |
| H | -8.974988 | 2.711930  | 2.569152  |
| H | -8.502937 | 2.334225  | 0.152093  |
| H | -5.303924 | 1.916663  | -1.297548 |
| H | -6.048285 | 0.311592  | -1.204122 |
| H | -7.051749 | 1.723702  | -1.603021 |
| H | -0.529249 | 1.698653  | 1.635953  |
| C | 6.308581  | -4.084255 | 1.471863  |
| C | 6.397421  | -2.619180 | 1.037957  |
| N | 7.737821  | -2.236013 | 0.581795  |
| C | 8.679753  | -2.071243 | 1.698543  |
| C | 10.118264 | -1.807877 | 1.260648  |
| C | 7.715535  | -1.148500 | -0.397194 |
| C | 7.258197  | 0.222601  | 0.134122  |
| O | 7.882857  | 0.811045  | 1.011959  |
| N | 6.112911  | 0.713429  | -0.446864 |
| C | 5.572612  | 2.012825  | -0.207912 |
| C | 5.099650  | 2.379565  | 1.070605  |
| C | 5.157290  | 1.435166  | 2.242446  |
| C | 4.551698  | 3.662807  | 1.231697  |
| C | 4.468229  | 4.554347  | 0.162510  |
| C | 4.936675  | 4.173793  | -1.097356 |
| C | 5.497383  | 2.906647  | -1.300551 |
| C | 6.040659  | 2.513334  | -2.654151 |
| H | 5.263597  | -4.347543 | 1.703277  |
| H | 6.666425  | -4.745628 | 0.665985  |
| H | 6.908047  | -4.293279 | 2.372165  |
| H | 5.698308  | -2.460296 | 0.201739  |
| H | 6.040470  | -1.966354 | 1.866244  |
| H | 8.358181  | -1.264154 | 2.388102  |
| H | 8.654228  | -3.013173 | 2.270455  |
| H | 10.443316 | -2.540266 | 0.502729  |
| H | 10.233450 | -0.792730 | 0.852274  |
| H | 10.792058 | -1.890181 | 2.128787  |

|   |           |           |           |
|---|-----------|-----------|-----------|
| H | 8.734775  | -1.003276 | -0.786754 |
| H | 7.085830  | -1.462231 | -1.243556 |
| H | 5.735956  | 0.196709  | -1.246905 |
| H | 4.465280  | 1.744121  | 3.038742  |
| H | 4.897824  | 0.409186  | 1.939189  |
| H | 6.180662  | 1.391959  | 2.646480  |
| H | 4.171465  | 3.951954  | 2.214378  |
| H | 4.043228  | 5.550265  | 0.311888  |
| H | 4.889390  | 4.875099  | -1.935090 |
| H | 5.502696  | 1.652860  | -3.084913 |
| H | 5.969017  | 3.353231  | -3.361077 |
| H | 7.099909  | 2.214491  | -2.583184 |
| C | 2.864002  | 3.406710  | -4.928750 |
| C | 1.577525  | 2.692924  | -5.337150 |
| N | 0.392898  | 3.185661  | -4.607471 |
| C | -0.861243 | 2.930360  | -5.337564 |
| C | -1.091750 | 3.887320  | -6.505703 |
| C | 0.319878  | 2.661429  | -3.239078 |
| C | -0.297139 | 3.639070  | -2.231016 |
| O | -0.629790 | 3.273306  | -1.103447 |
| N | -0.394290 | 4.915641  | -2.696478 |
| C | -0.803885 | 6.071568  | -1.970160 |
| C | -2.107937 | 6.165260  | -1.440140 |
| C | -3.115213 | 5.055877  | -1.597814 |
| C | -2.460758 | 7.344227  | -0.765351 |
| C | -1.560196 | 8.400054  | -0.627550 |
| C | -0.278827 | 8.293629  | -1.171255 |
| C | 0.119590  | 7.133621  | -1.846292 |
| C | 1.508855  | 7.020185  | -2.426890 |
| H | 3.102994  | 3.262227  | -3.863176 |
| H | 3.716502  | 3.015178  | -5.506944 |
| H | 2.787491  | 4.490228  | -5.116043 |
| H | 1.402764  | 2.872861  | -6.408739 |
| H | 1.692545  | 1.595040  | -5.219353 |
| H | -0.901384 | 1.876235  | -5.690858 |
| H | -1.690123 | 3.044494  | -4.621138 |
| H | -1.126553 | 4.931878  | -6.156241 |
| H | -0.303496 | 3.813918  | -7.271539 |
| H | -2.050486 | 3.659548  | -6.999432 |
| H | -0.234286 | 1.706306  | -3.165124 |
| H | 1.336691  | 2.458476  | -2.867603 |
| H | 0.046368  | 5.022708  | -3.612989 |
| H | -3.088836 | 4.636273  | -2.616291 |
| H | -2.898765 | 4.228253  | -0.904301 |
| H | -4.132999 | 5.422515  | -1.400432 |
| H | -3.470188 | 7.432621  | -0.355735 |

|   |            |           |           |
|---|------------|-----------|-----------|
| H | -1.859150  | 9.310934  | -0.103863 |
| H | 0.429991   | 9.118936  | -1.068291 |
| H | 1.493166   | 6.971957  | -3.530483 |
| H | 2.121323   | 7.889454  | -2.147878 |
| H | 2.022584   | 6.110460  | -2.075474 |
| C | -2.659603  | -6.144468 | -3.078027 |
| C | -2.355532  | -6.175117 | -1.581905 |
| N | -3.292305  | -5.358894 | -0.784754 |
| C | -3.413285  | -5.840948 | 0.603341  |
| C | -4.270245  | -7.098026 | 0.737167  |
| C | -2.947032  | -3.936860 | -0.812354 |
| C | -4.151377  | -3.018341 | -0.593801 |
| O | -4.015345  | -1.860028 | -0.186338 |
| N | -5.335374  | -3.589994 | -0.932077 |
| C | -6.602341  | -2.940431 | -1.043387 |
| C | -7.250020  | -2.439512 | 0.104307  |
| C | -6.651151  | -2.592889 | 1.479452  |
| C | -8.496370  | -1.817870 | -0.061906 |
| C | -9.090768  | -1.717912 | -1.319642 |
| C | -8.446014  | -2.246486 | -2.438989 |
| C | -7.193672  | -2.863260 | -2.323004 |
| C | -6.502066  | -3.444021 | -3.533199 |
| H | -2.608061  | -5.127396 | -3.495203 |
| H | -1.932453  | -6.769060 | -3.623206 |
| H | -3.668604  | -6.542151 | -3.276200 |
| H | -2.433828  | -7.213109 | -1.225533 |
| H | -1.307244  | -5.861830 | -1.392156 |
| H | -2.408323  | -6.009623 | 1.048390  |
| H | -3.878640  | -5.035975 | 1.194465  |
| H | -5.290017  | -6.918977 | 0.359906  |
| H | -3.851244  | -7.952677 | 0.182737  |
| H | -4.342337  | -7.397191 | 1.795415  |
| H | -2.164721  | -3.656084 | -0.081443 |
| H | -2.559768  | -3.670934 | -1.808248 |
| H | -5.214433  | -4.533323 | -1.306821 |
| H | -7.372727  | -2.299292 | 2.254640  |
| H | -6.350166  | -3.637390 | 1.664366  |
| H | -5.747691  | -1.975475 | 1.596399  |
| H | -9.006304  | -1.415562 | 0.816257  |
| H | -10.064431 | -1.234213 | -1.426830 |
| H | -8.914424  | -2.176797 | -3.423982 |
| H | -6.484948  | -4.548658 | -3.497243 |
| H | -7.031643  | -3.161438 | -4.454990 |
| H | -5.453722  | -3.116266 | -3.617945 |
| C | 4.551724   | -0.461522 | -6.883231 |
| C | 3.899426   | -1.249765 | -5.768213 |



|   |           |           |           |
|---|-----------|-----------|-----------|
| O | 2.773492  | -0.992441 | -5.375695 |
| C | 4.727147  | -2.373152 | -5.160566 |
| C | 4.192149  | -2.865630 | -3.821768 |
| C | 4.310668  | -1.800171 | -2.736431 |
| O | 5.122792  | -0.884853 | -2.828008 |
| O | 3.539123  | -1.929898 | -1.675465 |
| H | 5.088026  | -1.121760 | -7.583635 |
| H | 3.803747  | 0.138419  | -7.417871 |
| H | 5.303810  | 0.212751  | -6.437457 |
| H | 4.746683  | -3.197058 | -5.898018 |
| H | 5.766637  | -2.023743 | -5.057968 |
| H | 3.153964  | -3.217001 | -3.893476 |
| H | 4.782923  | -3.732578 | -3.478214 |
| H | 2.880496  | -2.724488 | -1.745884 |
| C | -3.431348 | -1.126404 | -5.824300 |
| C | -2.505653 | -2.017833 | -5.027283 |
| O | -2.934325 | -2.843633 | -4.237426 |
| C | -1.014719 | -1.827570 | -5.266445 |
| C | -0.139785 | -2.302967 | -4.112870 |
| C | -0.465837 | -1.553487 | -2.829589 |
| O | -1.143626 | -0.538921 | -2.813804 |
| O | 0.025188  | -2.061009 | -1.700760 |
| H | -4.461403 | -1.504348 | -5.791701 |
| H | -3.401294 | -0.121183 | -5.368641 |
| H | -3.091680 | -1.020689 | -6.867224 |
| H | -0.764823 | -2.383827 | -6.189440 |
| H | -0.821901 | -0.766629 | -5.487889 |
| H | -0.245762 | -3.383693 | -3.935296 |
| H | 0.919889  | -2.112214 | -4.352896 |
| H | 0.699792  | -2.815816 | -1.827946 |
| C | -1.721100 | 2.232589  | 6.834867  |
| C | -0.881512 | 1.025088  | 6.489295  |
| O | -1.180796 | 0.271004  | 5.577971  |
| C | 0.369037  | 0.789341  | 7.329799  |
| C | 1.322854  | -0.229853 | 6.714185  |
| C | 2.050446  | 0.344302  | 5.505625  |
| O | 2.237752  | 1.548106  | 5.391734  |
| O | 2.497647  | -0.502245 | 4.591522  |
| H | -2.769501 | 2.052598  | 6.559267  |
| H | -1.642129 | 2.505434  | 7.898462  |
| H | -1.362008 | 3.090514  | 6.236951  |
| H | 0.878493  | 1.753023  | 7.488135  |
| H | 0.026182  | 0.450221  | 8.324778  |
| H | 2.096332  | -0.520946 | 7.445886  |
| H | 0.794207  | -1.147886 | 6.424031  |
| H | 2.293427  | -1.457867 | 4.818305  |

|   |           |          |          |
|---|-----------|----------|----------|
| C | -3.160088 | 5.376152 | 3.292873 |
| C | -1.678077 | 5.137492 | 3.471660 |
| O | -1.192440 | 4.857634 | 4.556297 |
| C | -0.815277 | 5.226179 | 2.223545 |
| C | 0.674439  | 5.081062 | 2.520583 |
| C | 1.022822  | 3.739509 | 3.125402 |
| O | 0.450640  | 2.693250 | 2.837795 |
| O | 2.048983  | 3.790082 | 3.963397 |
| H | -3.572210 | 4.536614 | 2.708220 |
| H | -3.655150 | 5.426254 | 4.271807 |
| H | -3.346976 | 6.300944 | 2.723080 |
| H | -1.157931 | 4.439895 | 1.529529 |
| H | -1.014388 | 6.181844 | 1.710166 |
| H | 1.244449  | 5.160355 | 1.578808 |
| H | 1.035608  | 5.870199 | 3.194463 |
| H | 2.187645  | 2.888487 | 4.366482 |

Table S22. B3LYP/cc-pVDZ optimized geometry of Lid:Cou:Le structure C.

241

|   |           |           |           |
|---|-----------|-----------|-----------|
| C | 2.923164  | -0.352859 | 7.014160  |
| C | 2.500472  | -0.902954 | 5.678892  |
| C | 1.630276  | -1.965160 | 5.607645  |
| C | 1.203002  | -2.507950 | 4.352866  |
| O | 0.412898  | -3.450494 | 4.209024  |
| O | 1.706178  | -1.951923 | 3.207385  |
| C | 2.572011  | -0.879827 | 3.229773  |
| C | 2.984734  | -0.393684 | 1.997982  |
| C | 3.830373  | 0.744465  | 1.931447  |
| O | 4.181350  | 1.270662  | 0.784359  |
| C | 4.287608  | 1.302918  | 3.171211  |
| C | 3.881635  | 0.782995  | 4.382301  |
| C | 2.994771  | -0.322930 | 4.461560  |
| H | 4.017743  | -0.404296 | 7.133014  |
| H | 2.641243  | 0.708457  | 7.109523  |
| H | 2.458991  | -0.909421 | 7.839485  |
| H | 1.218612  | -2.437448 | 6.499029  |
| H | 2.647686  | -0.889767 | 1.087814  |
| H | 4.958236  | 2.163216  | 3.132368  |
| H | 4.242910  | 1.242276  | 5.304176  |
| C | -0.475271 | -0.040035 | 0.788574  |
| C | -1.365504 | 0.186303  | -0.423097 |
| N | -1.384800 | -0.981741 | -1.388896 |
| C | -0.012579 | -1.248904 | -1.972323 |
| C | -0.020824 | -2.220588 | -3.142490 |
| C | -2.030860 | -2.188581 | -0.788631 |

|   |           |           |           |
|---|-----------|-----------|-----------|
| C | -2.834926 | -2.934667 | -1.851835 |
| O | -3.347061 | -2.311525 | -2.782663 |
| N | -2.959846 | -4.263352 | -1.616653 |
| C | -3.761605 | -5.159599 | -2.394607 |
| C | -5.160478 | -4.987040 | -2.451043 |
| C | -5.850937 | -3.867661 | -1.715177 |
| C | -5.907409 | -5.906713 | -3.201888 |
| C | -5.293774 | -6.972254 | -3.858881 |
| C | -3.910245 | -7.133883 | -3.777100 |
| C | -3.121217 | -6.231372 | -3.052731 |
| C | -1.620912 | -6.394488 | -3.002666 |
| H | -0.644627 | 0.786037  | 1.495356  |
| H | -0.707406 | -0.977467 | 1.316014  |
| H | 0.589837  | -0.037455 | 0.526179  |
| H | -2.408474 | 0.332415  | -0.113564 |
| H | -1.033390 | 1.047642  | -1.014378 |
| H | 0.372155  | -0.269427 | -2.282360 |
| H | 0.612139  | -1.629968 | -1.155239 |
| H | -0.350999 | -3.229031 | -2.850254 |
| H | -0.637032 | -1.863598 | -3.980016 |
| H | 1.015113  | -2.308769 | -3.506034 |
| H | -1.273725 | -2.816264 | -0.308072 |
| H | -2.744981 | -1.844293 | -0.023669 |
| H | -2.325250 | -4.664109 | -0.914189 |
| H | -5.498731 | -3.795767 | -0.673744 |
| H | -5.645115 | -2.896063 | -2.192235 |
| H | -6.939001 | -4.026269 | -1.699566 |
| H | -6.992276 | -5.785605 | -3.254698 |
| H | -5.895109 | -7.682343 | -4.431335 |
| H | -3.425628 | -7.967938 | -4.290670 |
| H | -1.236831 | -6.446589 | -1.972202 |
| H | -1.313480 | -7.307084 | -3.533609 |
| H | -1.116284 | -5.539208 | -3.484387 |
| H | -1.986386 | -0.679713 | -2.179823 |
| C | 10.422092 | 0.651289  | -2.412103 |
| C | 8.975499  | 0.254387  | -2.696887 |
| N | 8.020412  | 0.668249  | -1.658254 |
| C | 6.629626  | 0.365712  | -2.028891 |
| C | 6.072474  | 1.266174  | -3.132503 |
| C | 8.353853  | 0.220068  | -0.300589 |
| C | 8.430647  | -1.304480 | -0.107940 |
| O | 9.430994  | -1.947719 | -0.399631 |
| N | 7.273094  | -1.885212 | 0.378712  |
| C | 7.105056  | -3.250639 | 0.753358  |
| C | 7.293771  | -4.293542 | -0.180910 |
| C | 7.673467  | -4.030157 | -1.614519 |

|   |           |           |           |
|---|-----------|-----------|-----------|
| C | 7.091853  | -5.613018 | 0.255551  |
| C | 6.694669  | -5.897353 | 1.561779  |
| C | 6.492155  | -4.851920 | 2.464500  |
| C | 6.699660  | -3.521604 | 2.081134  |
| C | 6.505546  | -2.400582 | 3.073667  |
| H | 10.848769 | 0.055478  | -1.592098 |
| H | 11.037675 | 0.468822  | -3.307634 |
| H | 10.499007 | 1.721759  | -2.158395 |
| H | 8.651818  | 0.736778  | -3.632161 |
| H | 8.931238  | -0.842381 | -2.875593 |
| H | 6.512548  | -0.699697 | -2.331945 |
| H | 6.009044  | 0.504583  | -1.129972 |
| H | 6.589535  | 1.127731  | -4.095201 |
| H | 5.008836  | 1.025733  | -3.293491 |
| H | 6.141111  | 2.326114  | -2.843961 |
| H | 9.345302  | 0.608372  | -0.029997 |
| H | 7.623737  | 0.676132  | 0.384738  |
| H | 6.577856  | -1.237345 | 0.735011  |
| H | 7.088780  | -3.195004 | -2.033459 |
| H | 8.731118  | -3.735755 | -1.687367 |
| H | 7.501117  | -4.922517 | -2.234242 |
| H | 7.243746  | -6.428515 | -0.456264 |
| H | 6.544985  | -6.932623 | 1.877271  |
| H | 6.184814  | -5.066390 | 3.491161  |
| H | 7.402441  | -1.763184 | 3.141821  |
| H | 5.662027  | -1.741105 | 2.802540  |
| H | 6.294420  | -2.800266 | 4.075819  |
| C | -6.114618 | 2.433464  | 5.219020  |
| C | -6.755447 | 2.732025  | 3.865552  |
| N | -6.703478 | 1.584264  | 2.937796  |
| C | -7.712934 | 1.691990  | 1.862945  |
| C | -9.142884 | 1.437993  | 2.334666  |
| C | -5.367459 | 1.423552  | 2.352355  |
| C | -4.979153 | -0.028687 | 2.065880  |
| O | -4.070620 | -0.303703 | 1.277296  |
| N | -5.679271 | -0.938097 | 2.794558  |
| C | -5.509054 | -2.354971 | 2.774831  |
| C | -6.600077 | -3.156846 | 2.376052  |
| C | -7.911542 | -2.532311 | 1.965856  |
| C | -6.439129 | -4.547872 | 2.366814  |
| C | -5.223242 | -5.129222 | 2.731010  |
| C | -4.160287 | -4.322700 | 3.135145  |
| C | -4.285372 | -2.926121 | 3.183127  |
| C | -3.147528 | -2.078847 | 3.692020  |
| H | -6.612034 | 1.580848  | 5.709136  |
| H | -5.042155 | 2.195761  | 5.130870  |

|   |           |           |           |
|---|-----------|-----------|-----------|
| H | -6.197387 | 3.311541  | 5.879563  |
| H | -7.814303 | 2.979478  | 4.029200  |
| H | -6.289885 | 3.627915  | 3.405051  |
| H | -7.636559 | 2.675979  | 1.356194  |
| H | -7.455097 | 0.936916  | 1.102280  |
| H | -9.230712 | 0.454494  | 2.824251  |
| H | -9.496401 | 2.201015  | 3.045738  |
| H | -9.829737 | 1.455416  | 1.473131  |
| H | -5.239291 | 2.007372  | 1.424484  |
| H | -4.609035 | 1.796002  | 3.059463  |
| H | -6.460794 | -0.512824 | 3.299333  |
| H | -8.399561 | -2.007135 | 2.805800  |
| H | -7.773423 | -1.789958 | 1.163082  |
| H | -8.614119 | -3.297833 | 1.606586  |
| H | -7.276597 | -5.178216 | 2.057617  |
| H | -5.107401 | -6.215150 | 2.705659  |
| H | -3.208764 | -4.772733 | 3.423716  |
| H | -2.687814 | -1.501420 | 2.875421  |
| H | -3.505875 | -1.347323 | 4.435107  |
| H | -2.370990 | -2.699613 | 4.158901  |
| C | -4.497120 | 5.691588  | -3.732470 |
| C | -5.507840 | 4.697152  | -3.162603 |
| N | -4.928050 | 3.408291  | -2.766064 |
| C | -5.995883 | 2.423774  | -2.503630 |
| C | -5.500012 | 1.039589  | -2.092550 |
| C | -3.884032 | 3.507217  | -1.755004 |
| C | -4.278980 | 4.130749  | -0.403269 |
| O | -5.420162 | 4.049457  | 0.049623  |
| N | -3.247864 | 4.753581  | 0.252974  |
| C | -3.336316 | 5.284793  | 1.578550  |
| C | -4.179461 | 6.382763  | 1.851156  |
| C | -5.016267 | 7.025250  | 0.775569  |
| C | -4.213225 | 6.882550  | 3.161784  |
| C | -3.426943 | 6.326131  | 4.169891  |
| C | -2.589026 | 5.248485  | 3.879190  |
| C | -2.533900 | 4.708403  | 2.587868  |
| C | -1.649292 | 3.522145  | 2.289146  |
| H | -3.912696 | 5.244262  | -4.553425 |
| H | -5.025849 | 6.572933  | -4.129572 |
| H | -3.791437 | 6.057655  | -2.969659 |
| H | -6.060907 | 5.170619  | -2.323182 |
| H | -6.259322 | 4.475193  | -3.939208 |
| H | -6.708268 | 2.797630  | -1.742938 |
| H | -6.557576 | 2.332577  | -3.450772 |
| H | -5.118287 | 1.013306  | -1.060229 |
| H | -6.335727 | 0.322884  | -2.143491 |

|   |           |           |           |
|---|-----------|-----------|-----------|
| H | -4.698933 | 0.676628  | -2.754673 |
| H | -3.501103 | 2.496723  | -1.546907 |
| H | -3.028344 | 4.058887  | -2.172705 |
| H | -2.309643 | 4.651307  | -0.144057 |
| H | -5.388305 | 8.007546  | 1.101484  |
| H | -4.435621 | 7.162458  | -0.150882 |
| H | -5.874488 | 6.384974  | 0.518484  |
| H | -4.860924 | 7.734454  | 3.384044  |
| H | -3.461244 | 6.736775  | 5.181736  |
| H | -1.968952 | 4.809631  | 4.665017  |
| H | -0.884327 | 3.754719  | 1.531171  |
| H | -1.134815 | 3.180718  | 3.199302  |
| H | -2.240037 | 2.678659  | 1.892801  |
| C | 6.917742  | 7.979790  | -1.087974 |
| C | 7.186692  | 6.746095  | -0.247661 |
| O | 6.877829  | 6.689986  | 0.926494  |
| C | 7.870120  | 5.581449  | -0.955283 |
| C | 7.818703  | 4.283893  | -0.160716 |
| C | 6.421681  | 3.697544  | -0.096991 |
| O | 5.515910  | 4.044080  | -0.842718 |
| O | 6.313167  | 2.740989  | 0.818278  |
| H | 6.611946  | 8.815709  | -0.445211 |
| H | 7.800763  | 8.258958  | -1.685997 |
| H | 6.105623  | 7.754434  | -1.800985 |
| H | 7.411615  | 5.450988  | -1.948803 |
| H | 8.918850  | 5.882374  | -1.135719 |
| H | 8.446500  | 3.510907  | -0.636187 |
| H | 8.186206  | 4.426450  | 0.865496  |
| H | 5.410354  | 2.267541  | 0.761360  |
| C | -0.291491 | 5.612528  | -2.854205 |
| C | 0.295939  | 4.833128  | -1.701017 |
| O | -0.401258 | 4.424075  | -0.781241 |
| C | 1.795730  | 4.604562  | -1.735402 |
| C | 2.307513  | 3.415135  | -0.932489 |
| C | 1.926553  | 2.087035  | -1.557384 |
| O | 1.082421  | 2.000850  | -2.451855 |
| O | 2.514733  | 1.000456  | -1.104956 |
| H | -0.457770 | 4.903068  | -3.684558 |
| H | -1.254773 | 6.059004  | -2.573953 |
| H | 0.400307  | 6.388498  | -3.216431 |
| H | 2.125713  | 4.544102  | -2.784742 |
| H | 2.246812  | 5.533344  | -1.336358 |
| H | 3.402131  | 3.473702  | -0.827944 |
| H | 1.890159  | 3.428478  | 0.088594  |
| H | 3.210621  | 1.159042  | -0.346908 |
| C | 3.541675  | -4.293590 | -1.328029 |

|   |           |           |           |
|---|-----------|-----------|-----------|
| C | 2.444071  | -4.273296 | -0.291787 |
| O | 1.851038  | -3.249858 | 0.010973  |
| C | 2.098451  | -5.597165 | 0.375410  |
| C | 1.148504  | -5.430520 | 1.558883  |
| C | -0.207756 | -4.882151 | 1.141593  |
| O | -0.736014 | -5.201954 | 0.081742  |
| O | -0.828506 | -4.067950 | 1.980716  |
| H | 4.510207  | -4.462029 | -0.825651 |
| H | 3.398985  | -5.126781 | -2.035335 |
| H | 3.576466  | -3.337550 | -1.866224 |
| H | 1.642744  | -6.243217 | -0.395419 |
| H | 3.032455  | -6.096139 | 0.684681  |
| H | 0.963316  | -6.413958 | 2.024242  |
| H | 1.589004  | -4.785096 | 2.330009  |
| H | -0.273529 | -3.841418 | 2.792045  |
| C | -3.475467 | -2.026252 | -6.190497 |
| C | -2.750526 | -0.709057 | -6.038711 |
| O | -1.537852 | -0.621629 | -6.126459 |
| C | -3.604046 | 0.507935  | -5.708399 |
| C | -2.790612 | 1.773756  | -5.448553 |
| C | -1.807491 | 1.611755  | -4.312294 |
| O | -2.000539 | 0.876793  | -3.352674 |
| O | -0.735571 | 2.394185  | -4.422166 |
| H | -2.843128 | -2.744770 | -6.729134 |
| H | -3.670122 | -2.414696 | -5.174418 |
| H | -4.446438 | -1.910360 | -6.697200 |
| H | -4.309236 | 0.674171  | -6.542195 |
| H | -4.229115 | 0.249490  | -4.837765 |
| H | -2.245346 | 2.101199  | -6.344163 |
| H | -3.474380 | 2.584030  | -5.139655 |
| H | -0.119937 | 2.223677  | -3.661191 |

Table S23. B3LYP/cc-pVDZ//B3LYP-GD3BJ/6-311++g(d,p) counterpoise corrected interaction energies (in kcal mol<sup>-1</sup>) of Lid:Cou:La and Lid:Cou:Le.

| Structure | Lid:Cou:La | Lid:Cou:Le |
|-----------|------------|------------|
| A         | -276.2     | -314.1     |
| B         | -275.5     | -254.7     |
| C         | -273.9     | -252.4     |
| D         | -267.2     | -          |
| E         | -251.6     | -          |
